# Supplementary material for: A summary of Blastocystis subtypes in North and South America
Source: Parasit Vectors. 2019 Jul 29;12:376. doi: 10.1186/s13071-019-3641-2 (PMC6664531; doi:10.1186/s13071-019-3641-2)
Supplement: Supplementary file 1 — Additional file 1: Table S1. Microsoft Excel database assembly of all the information from the articles included in this review. [file 13071_2019_3641_MOESM1_ESM.xlsx]

## Sheet: Table S1
Country	State	Number of samples	Positive samples	Host	ST	ST´s sample	Alleles	Method	year	Author	Latitude	Longitude	Reference
Argentina	Ciudad Cordoba	270	67	Humano	ST3	48	a34	PCR amplification of Blastocystis-specific SSUr DNA using the primers RD5 (5′-ATCTGGTTGATCCTGCCAGT-3′) and BhRDr (5′-GAGCTTTTTAACTGCAACAACG-3′)	2015	Casero et al	-31.4135000	-64.1810500	Casero, R. D., Mongi, F., Sánchez, A., & Ramírez, J. D. (2015). Blastocystis and urticaria: Examination of subtypes and morphotypes in an unusual clinical manifestation. Acta Tropica, 148, 156-161.
Argentina	Ciudad Cordoba	270	67	Humano	ST1	10	a134	PCR amplification of Blastocystis-specific SSUr DNA using the primers RD5 (5′-ATCTGGTTGATCCTGCCAGT-3′) and BhRDr (5′-GAGCTTTTTAACTGCAACAACG-3′)	2015	Casero et al	-31.4135000	-64.1810500	Casero, R. D., Mongi, F., Sánchez, A., & Ramírez, J. D. (2015). Blastocystis and urticaria: Examination of subtypes and morphotypes in an unusual clinical manifestation. Acta Tropica, 148, 156-161.
Argentina	Ciudad Cordoba	270	67	Humano	ST6	5		PCR amplification of Blastocystis-specific SSUr DNA using the primers RD5 (5′-ATCTGGTTGATCCTGCCAGT-3′) and BhRDr (5′-GAGCTTTTTAACTGCAACAACG-3′)	2015	Casero et al	-31.4135000	-64.1810500	Casero, R. D., Mongi, F., Sánchez, A., & Ramírez, J. D. (2015). Blastocystis and urticaria: Examination of subtypes and morphotypes in an unusual clinical manifestation. Acta Tropica, 148, 156-161.
Argentina	Ciudad Cordoba	270	67	Humano	ST2	4		PCR amplification of Blastocystis-specific SSUr DNA using the primers RD5 (5′-ATCTGGTTGATCCTGCCAGT-3′) and BhRDr (5′-GAGCTTTTTAACTGCAACAACG-3′)	2015	Casero et al	-31.4135000	-64.1810500	Casero, R. D., Mongi, F., Sánchez, A., & Ramírez, J. D. (2015). Blastocystis and urticaria: Examination of subtypes and morphotypes in an unusual clinical manifestation. Acta Tropica, 148, 156-161.
Argentina	Ciudad Cordoba	65	65	Humano	ST1	11		PCR amplification of Blastocystis-specific SSUr DNA using the primers RD5 (5′-ATCTGGTTGATCCTGCCAGT-3′) and BhRDr (5′-GAGCTTTTTAACTGCAACAACG-3′)	2016	Ramirez et al	-31.4135000	-64.1810500	Ramirez, J. D., Sanchez, A., Hernandez, C., Florez, C., Consuelo Bernal, M., Cesar Giraldo, J., . . . Casero, R. D. (2016). Geographic distribution of human Blastocystis subtypes in South America. In (Vol. 41, pp. 32-35)._x000D_ _x000D_
Argentina	Ciudad Cordoba	65	65	Humano	ST2	10		PCR amplification of Blastocystis-specific SSUr DNA using the primers RD5 (5′-ATCTGGTTGATCCTGCCAGT-3′) and BhRDr (5′-GAGCTTTTTAACTGCAACAACG-3′)	2016	Ramirez et al	-31.4135000	-64.1810500	Ramirez, J. D., Sanchez, A., Hernandez, C., Florez, C., Consuelo Bernal, M., Cesar Giraldo, J., . . . Casero, R. D. (2016). Geographic distribution of human Blastocystis subtypes in South America. In (Vol. 41, pp. 32-35)._x000D_ _x000D_
Argentina	Ciudad Cordoba	65	65	Humano	ST3	41		PCR amplification of Blastocystis-specific SSUr DNA using the primers RD5 (5′-ATCTGGTTGATCCTGCCAGT-3′) and BhRDr (5′-GAGCTTTTTAACTGCAACAACG-3′)	2016	Ramirez et al	-31.4135000	-64.1810500	Ramirez, J. D., Sanchez, A., Hernandez, C., Florez, C., Consuelo Bernal, M., Cesar Giraldo, J., . . . Casero, R. D. (2016). Geographic distribution of human Blastocystis subtypes in South America. In (Vol. 41, pp. 32-35)._x000D_ _x000D_
Argentina	Ciudad Cordoba	65	65	Humano	ST6	3		PCR amplification of Blastocystis-specific SSUr DNA using the primers RD5 (5′-ATCTGGTTGATCCTGCCAGT-3′) and BhRDr (5′-GAGCTTTTTAACTGCAACAACG-3′)	2016	Ramirez et al	-31.4135000	-64.1810500	Ramirez, J. D., Sanchez, A., Hernandez, C., Florez, C., Consuelo Bernal, M., Cesar Giraldo, J., . . . Casero, R. D. (2016). Geographic distribution of human Blastocystis subtypes in South America. In (Vol. 41, pp. 32-35)._x000D_ _x000D_
Brasil	Bahia Paraná, Paranaguá	766	102	Humano	ST1	37	a4	PCR method to specifically amplify a ~600-bp fragment of the SSU rRNA_x000D_ gene of the parasite	2018	Seguí et al	-25.5205	-48.5095	Seguí, R., Muñoz-Antoli, C., Klisiowicz, D., R., Oishi, C., Y., Köster, P., C., Lucio, A. d., . . . Carmena, D. (2018). Prevalence of intestinal parasites, with emphasis on the molecular epidemiology of Giardia duodenalis and Blastocystis sp., in the Paranaguá Bay, Brazil: a community survey. Parasites & Vectors, Vol 11, Iss 1, Pp 1-19 (2018)(1), 1.
Brasil	Bahia Paraná, Paranaguá	766	102	Humano	ST2	16	a9,10,11,12,15,71	PCR method to specifically amplify a ~600-bp fragment of the SSU rRNA_x000D_ gene of the parasite	2018	Seguí et al	-25.5205	-48.5095	Seguí, R., Muñoz-Antoli, C., Klisiowicz, D., R., Oishi, C., Y., Köster, P., C., Lucio, A. d., . . . Carmena, D. (2018). Prevalence of intestinal parasites, with emphasis on the molecular epidemiology of Giardia duodenalis and Blastocystis sp., in the Paranaguá Bay, Brazil: a community survey. Parasites & Vectors, Vol 11, Iss 1, Pp 1-19 (2018)(1), 1.
Brasil	Bahia Paraná, Paranaguá	766	102	Humano	ST3	42	a34,36,37	PCR method to specifically amplify a ~600-bp fragment of the SSU rRNA_x000D_ gene of the parasite	2018	Seguí et al	-25.5205	-48.5095	Seguí, R., Muñoz-Antoli, C., Klisiowicz, D., R., Oishi, C., Y., Köster, P., C., Lucio, A. d., . . . Carmena, D. (2018). Prevalence of intestinal parasites, with emphasis on the molecular epidemiology of Giardia duodenalis and Blastocystis sp., in the Paranaguá Bay, Brazil: a community survey. Parasites & Vectors, Vol 11, Iss 1, Pp 1-19 (2018)(1), 1.
Brasil	Bahia Paraná, Paranaguá	766	102	Humano	ST4	3	a42	PCR method to specifically amplify a ~600-bp fragment of the SSU rRNA_x000D_ gene of the parasite	2018	Seguí et al	-25.5205	-48.5095	Seguí, R., Muñoz-Antoli, C., Klisiowicz, D., R., Oishi, C., Y., Köster, P., C., Lucio, A. d., . . . Carmena, D. (2018). Prevalence of intestinal parasites, with emphasis on the molecular epidemiology of Giardia duodenalis and Blastocystis sp., in the Paranaguá Bay, Brazil: a community survey. Parasites & Vectors, Vol 11, Iss 1, Pp 1-19 (2018)(1), 1.
Brasil	Bahia Paraná, Paranaguá	766	102	Humano	ST6	1	a134	PCR method to specifically amplify a ~600-bp fragment of the SSU rRNA_x000D_ gene of the parasite	2018	Seguí et al	-25.5205	-48.5095	Seguí, R., Muñoz-Antoli, C., Klisiowicz, D., R., Oishi, C., Y., Köster, P., C., Lucio, A. d., . . . Carmena, D. (2018). Prevalence of intestinal parasites, with emphasis on the molecular epidemiology of Giardia duodenalis and Blastocystis sp., in the Paranaguá Bay, Brazil: a community survey. Parasites & Vectors, Vol 11, Iss 1, Pp 1-19 (2018)(1), 1.
Brasil	Bahia Paraná, Paranaguá	766	102	Humano	ST8	3	a21	PCR method to specifically amplify a ~600-bp fragment of the SSU rRNA_x000D_ gene of the parasite	2018	Seguí et al	-25.5205	-48.5095	Seguí, R., Muñoz-Antoli, C., Klisiowicz, D., R., Oishi, C., Y., Köster, P., C., Lucio, A. d., . . . Carmena, D. (2018). Prevalence of intestinal parasites, with emphasis on the molecular epidemiology of Giardia duodenalis and Blastocystis sp., in the Paranaguá Bay, Brazil: a community survey. Parasites & Vectors, Vol 11, Iss 1, Pp 1-19 (2018)(1), 1.
Brasil	Curitiba, Paraná	549	33	Humano	ST3	13		PCR amplification and sequencing of the SSU rRNA gene.	2019	Seguí et al	-25.4284	-49.2733	Seguí, R., Klisiowicz, D., R., Oishi, C., Y., Esteban, G., Köster, P., C., Carmena, D., Muñoz-Antoli, C. (2019).Molecular characterization of Blastocystis sp. in Campo do Tenente (Curitiba, Paraná, Brasil). 2nd International Blastocystis Conference
Brasil	Curitiba, Paraná	549	33	Humano	ST1	12		PCR amplification and sequencing of the SSU rRNA gene.	2019	Seguí et al	-25.4284	-49.2733	Seguí, R., Klisiowicz, D., R., Oishi, C., Y., Esteban, G., Köster, P., C., Carmena, D., Muñoz-Antoli, C. (2019).Molecular characterization of Blastocystis sp. in Campo do Tenente (Curitiba, Paraná, Brasil). _x000D_ 2nd International Blastocystis Conference
Brasil	Curitiba, Paraná	549	33	Humano	ST2	7		PCR amplification and sequencing of the SSU rRNA gene.	2019	Seguí et al	-25.4284	-49.2733	Seguí, R., Klisiowicz, D., R., Oishi, C., Y., Esteban, G., Köster, P., C., Carmena, D., Muñoz-Antoli, C. (2019).Molecular characterization of Blastocystis sp. in Campo do Tenente (Curitiba, Paraná, Brasil). _x000D_ 2nd International Blastocystis Conference
Brasil	Curitiba, Paraná	549	33	Humano	ST4	1		PCR amplification and sequencing of the SSU rRNA gene.	2019	Seguí et al	-25.4284	-49.2733	Seguí, R., Klisiowicz, D., R., Oishi, C., Y., Esteban, G., Köster, P., C., Carmena, D., Muñoz-Antoli, C. (2019).Molecular characterization of Blastocystis sp. in Campo do Tenente (Curitiba, Paraná, Brasil). 2nd International Blastocystis Conference
Brasil	Uberlandia y Belo Horizonte, Minas Gerais Estado	130	45	Aves	ST7	1		PCR and sequencing protocol was used to amplify 500 bp fragment of SSU rDNA gene.	2019	Satín et al	-19.8157	-43.9542	Satin. M., Rodruigues da cunha, M. J., Maloney, J. G., Cury, M. C. (2019) Widespread presence of human - pathogenic Blastocystis subtypes in chikens. 2nd International Blastocystis Conerence
Brasil	Uberlandia y Belo Horizonte, Minas Gerais Estado	130	45	Aves	ST6	1		PCR and sequencing protocol was used to amplify 500 bp fragment of SSU rDNA gene.	2019	Satín et al	-19.8157	-43.9542	Satin. M., Rodruigues da cunha, M. J., Maloney, J. G., Cury, M. C. (2019) Widespread presence of human - pathogenic Blastocystis subtypes in chikens. 2nd International Blastocystis Conerence
Brasil	Rio Janeiro, Pamparrão, Porteira Verde and Porteira Verde Alta valleys, in rural area of Sumidouro.	294	164	Humano	ST1	23		Genomic DNA was subjected to PCR analysis using primer pair Blast 505–532 (5’ GGA_x000D_ GGT AGT GAC AAT AAATC 3’) and Blast 998–1017 (5’TGC TTT CGC ACT TGT TCAT_x000D_ C 3’)	2018	Barbosa et al	-22.0452	-42.6734	Barbosa, C. V., Barreto, M. M., Andrade, R. d. J., Sodré, F., d’Avila-Levy, C. M., Peralta, J. M., . . . Santos, H. L. C. (2018). Intestinal parasite infections in a rural community of Rio de Janeiro (Brazil): Prevalence and genetic diversity of Blastocystis subtypes. PLoS ONE, 13(3), 1-12.
Brasil	Rio Janeiro, Pamparrão, Porteira Verde and Porteira Verde Alta valleys, in rural area of Sumidouro.	294	164	Humano	ST3	29		Genomic DNA was subjected to PCR analysis using primer pair Blast 505–532 (5’ GGA_x000D_ GGT AGT GAC AAT AAATC 3’) and Blast 998–1017 (5’TGC TTT CGC ACT TGT TCAT_x000D_ C 3’)	2018	Barbosa et al	-22.0452	-42.6734	Barbosa, C. V., Barreto, M. M., Andrade, R. d. J., Sodré, F., d’Avila-Levy, C. M., Peralta, J. M., . . . Santos, H. L. C. (2018). Intestinal parasite infections in a rural community of Rio de Janeiro (Brazil): Prevalence and genetic diversity of Blastocystis subtypes. PLoS ONE, 13(3), 1-12.
Brasil	Rio Janeiro, Pamparrão, Porteira Verde and Porteira Verde Alta valleys, in rural area of Sumidouro.	294	164	Humano	ST2	23		Genomic DNA was subjected to PCR analysis using primer pair Blast 505–532 (5’ GGA_x000D_ GGT AGT GAC AAT AAATC 3’) and Blast 998–1017 (5’TGC TTT CGC ACT TGT TCAT_x000D_ C 3’)	2018	Barbosa et al	-22.0452	-42.6734	Barbosa, C. V., Barreto, M. M., Andrade, R. d. J., Sodré, F., d’Avila-Levy, C. M., Peralta, J. M., . . . Santos, H. L. C. (2018). Intestinal parasite infections in a rural community of Rio de Janeiro (Brazil): Prevalence and genetic diversity of Blastocystis subtypes. PLoS ONE, 13(3), 1-12.
Brasil	Rio Janeiro, Pamparrão, Porteira Verde and Porteira Verde Alta valleys, in rural area of Sumidouro.	294	164	Humano	ST4	3		Genomic DNA was subjected to PCR analysis using primer pair Blast 505–532 (5’ GGA_x000D_ GGT AGT GAC AAT AAATC 3’) and Blast 998–1017 (5’TGC TTT CGC ACT TGT TCAT_x000D_ C 3’)	2018	Barbosa et al	-22.0452	-42.6734	Barbosa, C. V., Barreto, M. M., Andrade, R. d. J., Sodré, F., d’Avila-Levy, C. M., Peralta, J. M., . . . Santos, H. L. C. (2018). Intestinal parasite infections in a rural community of Rio de Janeiro (Brazil): Prevalence and genetic diversity of Blastocystis subtypes. PLoS ONE, 13(3), 1-12.
Brasil	Rio Janeiro, Pamparrão, Porteira Verde and Porteira Verde Alta valleys, in rural area of Sumidouro.	294	164	Humano	ST8	6		Genomic DNA was subjected to PCR analysis using primer pair Blast 505–532 (5’ GGA_x000D_ GGT AGT GAC AAT AAATC 3’) and Blast 998–1017 (5’TGC TTT CGC ACT TGT TCAT_x000D_ C 3’)	2018	Barbosa et al	-22.0452	-42.6734	Barbosa, C. V., Barreto, M. M., Andrade, R. d. J., Sodré, F., d’Avila-Levy, C. M., Peralta, J. M., . . . Santos, H. L. C. (2018). Intestinal parasite infections in a rural community of Rio de Janeiro (Brazil): Prevalence and genetic diversity of Blastocystis subtypes. PLoS ONE, 13(3), 1-12.
Brasil	Sao Paulo, Pueblo Botucatu	181	76	Humano	ST1	31	a4,78,80	PCR and, the amplification of a 600 bp fragment of the Blastocystis SSUrDNA	2018	Oliveira-Arbex	-22.8904	-48.4553	Oliveira-Arbex, A. P., David, É. B., & Guimarães, S. (2018). Blastocystis genetic diversity among children of low-income daycare center in Southeastern Brazil. Infection, Genetics and Evolution, 57, 59-63.
Brasil	Sao Paulo, Pueblo Botucatu town	181	76	Humano	ST2	4	a11,12	PCR and, the amplification of a 600 bp fragment of the Blastocystis SSUrDNA	2018	Oliveira-Arbex	-22.8904	-48.4553	Oliveira-Arbex, A. P., David, É. B., & Guimarães, S. (2018). Blastocystis genetic diversity among children of low-income daycare center in Southeastern Brazil. Infection, Genetics and Evolution, 57, 59-63.
Brasil	Sao Paulo, Pueblo Botucatu town	181	76	Humano	ST3	19	a34,36,37	PCR and, the amplification of a 600 bp fragment of the Blastocystis SSUrDNA	2018	Oliveira-Arbex	-22.8904	-48.4553	Oliveira-Arbex, A. P., David, É. B., & Guimarães, S. (2018). Blastocystis genetic diversity among children of low-income daycare center in Southeastern Brazil. Infection, Genetics and Evolution, 57, 59-63.
Brasil	Sao Paulo, Pueblo Botucatu town	181	76	Humano	ST7	3	a106,137	PCR and, the amplification of a 600 bp fragment of the Blastocystis SSUrDNA	2018	Oliveira-Arbex	-22.8904	-48.4553	Oliveira-Arbex, A. P., David, É. B., & Guimarães, S. (2018). Blastocystis genetic diversity among children of low-income daycare center in Southeastern Brazil. Infection, Genetics and Evolution, 57, 59-63.
Brasil	Sao Paulo, Pueblo Botucatu town	20	0	Perro	-	0		PCR and, the amplification of a 600 bp fragment of the Blastocystis SSUrDNA	2018	Oliveira-Arbex	-22.8904	-48.4553	Oliveira-Arbex, A. P., David, É. B., & Guimarães, S. (2018). Blastocystis genetic diversity among children of low-income daycare center in Southeastern Brazil. Infection, Genetics and Evolution, 57, 59-63.
Brasil	Rio de Janeiro, Duque de Caxias	180	64	Humano	ST1	23		PCR and primers: forward Blast 505-532 (5′-GGA GGT AGT_x000D_ GAC AAT AAA TC-3′) [52] and reverse Blast 998-1017_x000D_ (5′-TGC TTT CGC ACT TGT TCA TC-3′	2017	Barbosa et al	-22.9035	-43.2096	Barbosa, C. V., de Jesus Batista, R., Igreja, R. P., Levy, C. M. D. A., de Macedo, H. W., & Santos, H. L. C. (2017). Distribution of Blastocystis subtypes isolated from humans from an urban community in Rio de Janeiro, Brazil. Parasites & vectors, 10(1), 518.
Brasil	Rio de Janeiro, Duque de Caxias	180	64	Humano	ST2	4		PCR and primers: forward Blast 505-532 (5′-GGA GGT AGT_x000D_ GAC AAT AAA TC-3′) [52] and reverse Blast 998-1017_x000D_ (5′-TGC TTT CGC ACT TGT TCA TC-3′	2017	Barbosa et al	-22.9035	-43.2096	Barbosa, C. V., de Jesus Batista, R., Igreja, R. P., Levy, C. M. D. A., de Macedo, H. W., & Santos, H. L. C. (2017). Distribution of Blastocystis subtypes isolated from humans from an urban community in Rio de Janeiro, Brazil. Parasites & vectors, 10(1), 518.
Brasil	Rio de Janeiro, Duque de Caxias	180	64	Humano	ST3	27		PCR and primers: forward Blast 505-532 (5′-GGA GGT AGT_x000D_ GAC AAT AAA TC-3′) [52] and reverse Blast 998-1017_x000D_ (5′-TGC TTT CGC ACT TGT TCA TC-3′	2017	Barbosa et al	-22.9035	-43.2096	Barbosa, C. V., de Jesus Batista, R., Igreja, R. P., Levy, C. M. D. A., de Macedo, H. W., & Santos, H. L. C. (2017). Distribution of Blastocystis subtypes isolated from humans from an urban community in Rio de Janeiro, Brazil. Parasites & vectors, 10(1), 518.
Brasil	Rio de Janeiro, Duque de Caxias	180	64	Humano	ST4	1		PCR and primers: forward Blast 505-532 (5′-GGA GGT AGT_x000D_ GAC AAT AAA TC-3′) [52] and reverse Blast 998-1017_x000D_ (5′-TGC TTT CGC ACT TGT TCA TC-3′	2017	Barbosa et al	-22.9035	-43.2096	Barbosa, C. V., de Jesus Batista, R., Igreja, R. P., Levy, C. M. D. A., de Macedo, H. W., & Santos, H. L. C. (2017). Distribution of Blastocystis subtypes isolated from humans from an urban community in Rio de Janeiro, Brazil. Parasites & vectors, 10(1), 518.
Brasil	São Paulo, Porto Said	88	40	Humano	ST1	20	a4,81	PCR and amplification of a ~600 bp fragment of the small subunit ribosomal_x000D_ RNA (ssu rDNA)	2015	David et al	-22.8904	-48.4553	David, E. B., Guimaraes, S., de Oliveira, A. P., Goulart de Oliveira-Sequeira, T. C., Bittencourt, G. N., Moraes Nardi, A. R., . . . Caccio, S. M. (2015). Molecular characterization of intestinal protozoa in two poor communities in the State of Sao Paulo, Brazil. In (Vol. 8).
Brasil	São Paulo, Porto Said	88	40	Humano	ST2	3	a11,12	PCR and amplification of a ~600 bp fragment of the small subunit ribosomal_x000D_ RNA (ssu rDNA)	2015	David et al	-22.8904	-48.4553	David, E. B., Guimaraes, S., de Oliveira, A. P., Goulart de Oliveira-Sequeira, T. C., Bittencourt, G. N., Moraes Nardi, A. R., . . . Caccio, S. M. (2015). Molecular characterization of intestinal protozoa in two poor communities in the State of Sao Paulo, Brazil. In (Vol. 8).
Brasil	São Paulo, Porto Said	88	40	Humano	ST3	16	a34,36,37	PCR and amplification of a ~600 bp fragment of the small subunit ribosomal_x000D_ RNA (ssu rDNA)	2015	David et al	-22.8904	-48.4553	David, E. B., Guimaraes, S., de Oliveira, A. P., Goulart de Oliveira-Sequeira, T. C., Bittencourt, G. N., Moraes Nardi, A. R., . . . Caccio, S. M. (2015). Molecular characterization of intestinal protozoa in two poor communities in the State of Sao Paulo, Brazil. In (Vol. 8).
Brasil	São Paulo, Porto Said	88	40	Humano	ST6	1	a122,134	PCR and amplification of a ~600 bp fragment of the small subunit ribosomal_x000D_ RNA (ssu rDNA)	2015	David et al	-22.8904	-48.4553	David, E. B., Guimaraes, S., de Oliveira, A. P., Goulart de Oliveira-Sequeira, T. C., Bittencourt, G. N., Moraes Nardi, A. R., . . . Caccio, S. M. (2015). Molecular characterization of intestinal protozoa in two poor communities in the State of Sao Paulo, Brazil. In (Vol. 8).
Brasil	São Paulo, Santa Maria	38	27	Humano	ST1	3	a4	PCR and amplification of a ~600 bp fragment of the small subunit ribosomal_x000D_ RNA (ssu rDNA)	2015	David et al	-22.8904	-48.4553	David, E. B., Guimaraes, S., de Oliveira, A. P., Goulart de Oliveira-Sequeira, T. C., Bittencourt, G. N., Moraes Nardi, A. R., . . . Caccio, S. M. (2015). Molecular characterization of intestinal protozoa in two poor communities in the State of Sao Paulo, Brazil. In (Vol. 8)._x000D_ _x000D_
Brasil	São Paulo, Santa Maria	38	27	Humano	ST2	4	a9,10,12	PCR and amplification of a ~600 bp fragment of the small subunit ribosomal_x000D_ RNA (ssu rDNA)	2015	David et al	-22.8904	-48.4553	David, E. B., Guimaraes, S., de Oliveira, A. P., Goulart de Oliveira-Sequeira, T. C., Bittencourt, G. N., Moraes Nardi, A. R., . . . Caccio, S. M. (2015). Molecular characterization of intestinal protozoa in two poor communities in the State of Sao Paulo, Brazil. In (Vol. 8)._x000D_ _x000D_
Brasil	São Paulo, Santa Maria	38	27	Humano	ST3	13	a34,36,37	PCR and amplification of a ~600 bp fragment of the small subunit ribosomal_x000D_ RNA (ssu rDNA)	2015	David et al	-22.8904	-48.4553	David, E. B., Guimaraes, S., de Oliveira, A. P., Goulart de Oliveira-Sequeira, T. C., Bittencourt, G. N., Moraes Nardi, A. R., . . . Caccio, S. M. (2015). Molecular characterization of intestinal protozoa in two poor communities in the State of Sao Paulo, Brazil. In (Vol. 8)._x000D_ _x000D_
Brasil	São Paulo, Santa Maria	38	27	Humano	ST6	1	a122,134	PCR and amplification of a ~600 bp fragment of the small subunit ribosomal_x000D_ RNA (ssu rDNA)	2015	David et al	-22.8904	-48.4553	David, E. B., Guimaraes, S., de Oliveira, A. P., Goulart de Oliveira-Sequeira, T. C., Bittencourt, G. N., Moraes Nardi, A. R., . . . Caccio, S. M. (2015). Molecular characterization of intestinal protozoa in two poor communities in the State of Sao Paulo, Brazil. In (Vol. 8)._x000D_ _x000D_
Brasil	São Paulo, Santa Maria	38	27	Humano	ST7	4	a96	PCR and amplification of a ~600 bp fragment of the small subunit ribosomal_x000D_ RNA (ssu rDNA)	2015	David et al	-22.8904	-48.4553	David, E. B., Guimaraes, S., de Oliveira, A. P., Goulart de Oliveira-Sequeira, T. C., Bittencourt, G. N., Moraes Nardi, A. R., . . . Caccio, S. M. (2015). Molecular characterization of intestinal protozoa in two poor communities in the State of Sao Paulo, Brazil. In (Vol. 8)._x000D_ _x000D_
Brasil	São Paulo, Santa Maria	49	0	Perro	-	0		PCR and amplification of a ~600 bp fragment of the small subunit ribosomal_x000D_ RNA (ssu rDNA)	2015	David et al	-22.8904	-48.4553	David, E. B., Guimaraes, S., de Oliveira, A. P., Goulart de Oliveira-Sequeira, T. C., Bittencourt, G. N., Moraes Nardi, A. R., . . . Caccio, S. M. (2015). Molecular characterization of intestinal protozoa in two poor communities in the State of Sao Paulo, Brazil. In (Vol. 8).
Brasil	Mato_x000D_ Grosso, Tapirapé	382	80	Humano	ST1	27		The PCR and sequencing the Blastocystis-specific primer BhRDr (GAGCTTTTTAACTGCAACAACG) and the broad-specificity_x000D_ eukaryote-specific primer RD5 (ATCTGGTTGATCCTGCCAGT	2011	Malheiros et al	-10.6445	-51.5679	Malheiros, A. F., Stensvold, C. R., Clark, C. G., Braga, G. B., & Shaw, J. J. (2011). Short Report: Molecular Characterization of Blastocystis Obtained from Members of the Indigenous Tapirape Ethnic Group from the Brazilian Amazon Region, Brazil. In (Vol. 85, pp. 1050-1053)._x000D_ _x000D_
Brasil	Mato_x000D_ Grosso, Tapirapé	382	80	Humano	ST2	21		The PCR and sequencing the Blastocystis-specific primer BhRDr (GAGCTTTTTAACTGCAACAACG) and the broad-specificity_x000D_ eukaryote-specific primer RD5 (ATCTGGTTGATCCTGCCAGT	2011	Malheiros et al	-10.6445	-51.5679	Malheiros, A. F., Stensvold, C. R., Clark, C. G., Braga, G. B., & Shaw, J. J. (2011). Short Report: Molecular Characterization of Blastocystis Obtained from Members of the Indigenous Tapirape Ethnic Group from the Brazilian Amazon Region, Brazil. In (Vol. 85, pp. 1050-1053)._x000D_ _x000D_
Brasil	Mato_x000D_ Grosso, Tapirapé	382	80	Humano	ST3	11		The PCR and sequencing the Blastocystis-specific primer BhRDr (GAGCTTTTTAACTGCAACAACG) and the broad-specificity_x000D_ eukaryote-specific primer RD5 (ATCTGGTTGATCCTGCCAGT	2011	Malheiros et al	-10.6445	-51.5679	Malheiros, A. F., Stensvold, C. R., Clark, C. G., Braga, G. B., & Shaw, J. J. (2011). Short Report: Molecular Characterization of Blastocystis Obtained from Members of the Indigenous Tapirape Ethnic Group from the Brazilian Amazon Region, Brazil. In (Vol. 85, pp. 1050-1053)._x000D_ _x000D_
Brasil	São Paulo City, Brazil Hospital das Clínicas of the Faculdade de Medicina de São Paulo	60	47	Humano	ST1	9	a4	The PCR and sequencing the Blastocystis-specific primer BhRDr (GAGCTTTTTAACTGCAACAACG) and the broad-specificity_x000D_ eukaryote-specific primer RD5 (ATCTGGTTGATCCTGCCAGT	2017	Melo et al	-23.5489	-46.6388	Melo, G. B., Paula, F. M., Malta, F. M., Maruta, C. W., Criado, P. R., Castilho, V. L. P., . . . Gryschek, R. C. B. (2017). Identification of Blastocystis subtypes in clinical stool samples from Sao Paulo City, Brazil. Parasitology Open, 3, 1-6.
Brasil	São Paulo City, Brazil Hospital das Clínicas of the Faculdade de Medicina de São Paulo	60	47	Humano	ST2	5	a12,71	The PCR and sequencing the Blastocystis-specific primer BhRDr (GAGCTTTTTAACTGCAACAACG) and the broad-specificity_x000D_ eukaryote-specific primer RD5 (ATCTGGTTGATCCTGCCAGT	2017	Melo et al	-23.5489	-46.6388	Melo, G. B., Paula, F. M., Malta, F. M., Maruta, C. W., Criado, P. R., Castilho, V. L. P., . . . Gryschek, R. C. B. (2017). Identification of Blastocystis subtypes in clinical stool samples from Sao Paulo City, Brazil. Parasitology Open, 3, 1-6.
Brasil	São Paulo City, Brazil Hospital das Clínicas of the Faculdade de Medicina de São Paulo	60	47	Humano	ST3	24	a34,36,37	The PCR and sequencing the Blastocystis-specific primer BhRDr (GAGCTTTTTAACTGCAACAACG) and the broad-specificity_x000D_ eukaryote-specific primer RD5 (ATCTGGTTGATCCTGCCAGT	2017	Melo et al	-23.5489	-46.6388	Melo, G. B., Paula, F. M., Malta, F. M., Maruta, C. W., Criado, P. R., Castilho, V. L. P., . . . Gryschek, R. C. B. (2017). Identification of Blastocystis subtypes in clinical stool samples from Sao Paulo City, Brazil. Parasitology Open, 3, 1-6.
Brasil	São Paulo City, Brazil Hospital das Clínicas of the Faculdade de Medicina de São Paulo	60	47	Humano	ST6	2	a134	The PCR and sequencing the Blastocystis-specific primer BhRDr (GAGCTTTTTAACTGCAACAACG) and the broad-specificity_x000D_ eukaryote-specific primer RD5 (ATCTGGTTGATCCTGCCAGT	2017	Melo et al	-23.5489	-46.6388	Melo, G. B., Paula, F. M., Malta, F. M., Maruta, C. W., Criado, P. R., Castilho, V. L. P., . . . Gryschek, R. C. B. (2017). Identification of Blastocystis subtypes in clinical stool samples from Sao Paulo City, Brazil. Parasitology Open, 3, 1-6.
Brasil	Sao Paulo, Ciudad	22	22	Humano	ST1	2		PCR amplification of Blastocystis-specific SSUr DNA using the primers RD5 (5′-ATCTGGTTGATCCTGCCAGT-3′) and BhRDr (5′-GAGCTTTTTAACTGCAACAACG-3′)	2016	Ramirez et al	-23.5489	-46.6388	Ramirez, J. D., Sanchez, A., Hernandez, C., Florez, C., Consuelo Bernal, M., Cesar Giraldo, J., . . . Casero, R. D. (2016). Geographic distribution of human Blastocystis subtypes in South America. In (Vol. 41, pp. 32-35)._x000D_ _x000D_
Brasil	Sao Paulo, Ciudad	22	22	Humano	ST2	7		PCR amplification of Blastocystis-specific SSUr DNA using the primers RD5 (5′-ATCTGGTTGATCCTGCCAGT-3′) and BhRDr (5′-GAGCTTTTTAACTGCAACAACG-3′)	2016	Ramirez et al	-23.5489	-46.6388	Ramirez, J. D., Sanchez, A., Hernandez, C., Florez, C., Consuelo Bernal, M., Cesar Giraldo, J., . . . Casero, R. D. (2016). Geographic distribution of human Blastocystis subtypes in South America. In (Vol. 41, pp. 32-35)._x000D_ _x000D_
Brasil	Sao Paulo, Ciudad	22	22	Humano	ST3	8		PCR amplification of Blastocystis-specific SSUr DNA using the primers RD5 (5′-ATCTGGTTGATCCTGCCAGT-3′) and BhRDr (5′-GAGCTTTTTAACTGCAACAACG-3′)	2016	Ramirez et al	-23.5489	-46.6388	Ramirez, J. D., Sanchez, A., Hernandez, C., Florez, C., Consuelo Bernal, M., Cesar Giraldo, J., . . . Casero, R. D. (2016). Geographic distribution of human Blastocystis subtypes in South America. In (Vol. 41, pp. 32-35)._x000D_ _x000D_
Brasil	Sao Paulo, Ciudad	22	22	Humano	ST7	1		PCR amplification of Blastocystis-specific SSUr DNA using the primers RD5 (5′-ATCTGGTTGATCCTGCCAGT-3′) and BhRDr (5′-GAGCTTTTTAACTGCAACAACG-3′)	2016	Ramirez et al	-23.5489	-46.6388	Ramirez, J. D., Sanchez, A., Hernandez, C., Florez, C., Consuelo Bernal, M., Cesar Giraldo, J., . . . Casero, R. D. (2016). Geographic distribution of human Blastocystis subtypes in South America. In (Vol. 41, pp. 32-35)._x000D_ _x000D_
Brasil	Sao Paulo, Ciudad	22	22	Humano	ST8	2		PCR amplification of Blastocystis-specific SSUr DNA using the primers RD5 (5′-ATCTGGTTGATCCTGCCAGT-3′) and BhRDr (5′-GAGCTTTTTAACTGCAACAACG-3′)	2016	Ramirez et al	-23.5489	-46.6388	Ramirez, J. D., Sanchez, A., Hernandez, C., Florez, C., Consuelo Bernal, M., Cesar Giraldo, J., . . . Casero, R. D. (2016). Geographic distribution of human Blastocystis subtypes in South America. In (Vol. 41, pp. 32-35)._x000D_ _x000D_
Brasil	Sao Paulo, Ciudad	22	22	Humano	Novel ST	2		PCR amplification of Blastocystis-specific SSUr DNA using the primers RD5 (5′-ATCTGGTTGATCCTGCCAGT-3′) and BhRDr (5′-GAGCTTTTTAACTGCAACAACG-3′)	2016	Ramirez et al	-23.5489	-46.6388	Ramirez, J. D., Sanchez, A., Hernandez, C., Florez, C., Consuelo Bernal, M., Cesar Giraldo, J., . . . Casero, R. D. (2016). Geographic distribution of human Blastocystis subtypes in South America. In (Vol. 41, pp. 32-35)._x000D_ _x000D_
Brasil	Sao Paulo, Ciudad	60	29	Humano	ST1	10		PCR with specific primers from regions of the 18S ribosomal subunit	2019	Melo et al.	-23.5489	-46.6388	Melo, G.; M.-Paula F.; Malta, F; Maruta, C.; Criado, Paulo; Castilho, V.; Gonçalves, E.; Espirito-Santo, M.; Gryschek, Ronaldo. (2019) Molecular characterization of Blastocystis sp. in chronic urticaria patients, Sao Paulo, Brazil. 2nd International Blastocystis Conference
Brasil	Sao Paulo, Ciudad	60	29	Humano	ST2	5		PCR with specific primers from regions of the 18S ribosomal subunit	2019	Melo et al.	-23.5489	-46.6388	Melo, G.; M.-Paula F.; Malta, F; Maruta, C.; Criado, Paulo; Castilho, V.; Gonçalves, E.; Espirito-Santo, M.; Gryschek, Ronaldo. (2019) Molecular characterization of Blastocystis sp. in chronic urticaria patients, Sao Paulo, Brazil.
Brasil	Sao Paulo, Ciudad	60	29	Humano	ST3	9		PCR with specific primers from regions of the 18S ribosomal subunit	2019	Melo et al.	-23.5489	-46.6388	Melo, G.; M.-Paula F.; Malta, F; Maruta, C.; Criado, Paulo; Castilho, V.; Gonçalves, E.; Espirito-Santo, M.; Gryschek, Ronaldo. (2019) Molecular characterization of Blastocystis sp. in chronic urticaria patients, Sao Paulo, Brazil.
Brasil	Sao Paulo, Ciudad	60	29	Humano	ST4	1		PCR with specific primers from regions of the 18S ribosomal subunit	2019	Melo et al.	-23.5489	-46.6388	Melo, G.; M.-Paula F.; Malta, F; Maruta, C.; Criado, Paulo; Castilho, V.; Gonçalves, E.; Espirito-Santo, M.; Gryschek, Ronaldo. (2019) Molecular characterization of Blastocystis sp. in chronic urticaria patients, Sao Paulo, Brazil.
Brasil	Sao Paulo, Ciudad	60	29	Humano	ST8	1		PCR with specific primers from regions of the 18S ribosomal subunit	2019	Melo et al.	-23.5489	-46.6388	Melo, G.; M.-Paula F.; Malta, F; Maruta, C.; Criado, Paulo; Castilho, V.; Gonçalves, E.; Espirito-Santo, M.; Gryschek, Ronaldo. (2019) Molecular characterization of Blastocystis sp. in chronic urticaria patients, Sao Paulo, Brazil.
Brasil	Sao Paulo, Ciudad	60	29	Humano	Mixto	3		PCR with specific primers from regions of the 18S ribosomal subunit	2019	Melo et al.	-23.5489	-46.6388	Melo, G.; M.-Paula F.; Malta, F; Maruta, C.; Criado, Paulo; Castilho, V.; Gonçalves, E.; Espirito-Santo, M.; Gryschek, Ronaldo. (2019) Molecular characterization of Blastocystis sp. in chronic urticaria patients, Sao Paulo, Brazil.
Brasil	Uberaba Ciudad	18	13	Cerdo	ST1	3		PCR using the primers 1FB and 1RB, which amplified the 1.1-kb small subunit ribosomal DNA (SSU rDNA) gene fragments. Polymorphism (PCR-RFLP), using the SpeI endonuclease, and PCR-Sequence-Tagged Site (PCR-STS)	2015	Moura et al	-19.8164	-63.9763	Moura , R. G. F., Oliveira-Silva, M. B. d., Pedrosa, A. L., Nascentes, G. A. N., & Cabrine-Santos, M. (2015). Occurrence of Blastocystis spp. in domestic animals in Triângulo Mineiro area of Brazil. Revista da Sociedade Brasileira de Medicina Tropical, Vol 51, Iss 2, Pp 240-243(2), 240.
Brasil	Uberaba Ciudad	3	1	Oveja	-	0		PCR using the primers 1FB and 1RB, which amplified the 1.1-kb small subunit ribosomal DNA (SSU rDNA) gene fragments. Polymorphism (PCR-RFLP), using the SpeI endonuclease, and PCR-Sequence-Tagged Site (PCR-STS)	2015	Moura et al	-19.8164	-63.9763	Moura , R. G. F., Oliveira-Silva, M. B. d., Pedrosa, A. L., Nascentes, G. A. N., & Cabrine-Santos, M. (2015). Occurrence of Blastocystis spp. in domestic animals in Triângulo Mineiro area of Brazil. Revista da Sociedade Brasileira de Medicina Tropical, Vol 51, Iss 2, Pp 240-243(2), 240.
Brasil	Uberaba Ciudad	28	6	Ganado	-	0		PCR using the primers 1FB and 1RB, which amplified the 1.1-kb small subunit ribosomal DNA (SSU rDNA) gene fragments. Polymorphism (PCR-RFLP), using the SpeI endonuclease, and PCR-Sequence-Tagged Site (PCR-STS)	2015	Moura et al	-19.8164	-63.9763	Moura , R. G. F., Oliveira-Silva, M. B. d., Pedrosa, A. L., Nascentes, G. A. N., & Cabrine-Santos, M. (2015). Occurrence of Blastocystis spp. in domestic animals in Triângulo Mineiro area of Brazil. Revista da Sociedade Brasileira de Medicina Tropical, Vol 51, Iss 2, Pp 240-243(2), 240.
Brasil	Uberaba Ciudad	78	2	Perro	-	0		PCR using the primers 1FB and 1RB, which amplified the 1.1-kb small subunit ribosomal DNA (SSU rDNA) gene fragments. Polymorphism (PCR-RFLP), using the SpeI endonuclease, and PCR-Sequence-Tagged Site (PCR-STS)	2015	Moura et al	-19.8164	-63.9763	Moura , R. G. F., Oliveira-Silva, M. B. d., Pedrosa, A. L., Nascentes, G. A. N., & Cabrine-Santos, M. (2015). Occurrence of Blastocystis spp. in domestic animals in Triângulo Mineiro area of Brazil. Revista da Sociedade Brasileira de Medicina Tropical, Vol 51, Iss 2, Pp 240-243(2), 240.
Brasil	Uberaba Ciudad	16	0	Gato	-	0		PCR using the primers 1FB and 1RB, which amplified the 1.1-kb small subunit ribosomal DNA (SSU rDNA) gene fragments. Polymorphism (PCR-RFLP), using the SpeI endonuclease, and PCR-Sequence-Tagged Site (PCR-STS)	2015	Moura et al	-19.8164	-63.9763	Moura , R. G. F., Oliveira-Silva, M. B. d., Pedrosa, A. L., Nascentes, G. A. N., & Cabrine-Santos, M. (2015). Occurrence of Blastocystis spp. in domestic animals in Triângulo Mineiro area of Brazil. Revista da Sociedade Brasileira de Medicina Tropical, Vol 51, Iss 2, Pp 240-243(2), 240.
Bolivia	Bartolo, Departamento de Chuquisaca (municipality of Monteagudo, Hernando Siles Province)	112	57	Humano	ST1	4		PCR, mplification and sequencingto identify species/subtypes involve	2016	Macchioni et al	-19.8164	-63.9763	Macchioni, F., Segundo, H., Totino, V., Gabrielli, S., Rojas, P., Roselli, M., . . . Cancrini, G. (2016). Intestinal parasitic infections and associated epidemiological drivers in two rural communities of the Bolivian Chaco. In (Vol. 10, pp. 1012-1019)._x000D_ _x000D_
Bolivia	Bartolo, Departamento de Chuquisaca (municipality of Monteagudo, Hernando Siles Province)	112	57	Humano	ST2	1		PCR, mplification and sequencingto identify species/subtypes involve	2016	Macchioni et al	-19.8164	-63.9763	Macchioni, F., Segundo, H., Totino, V., Gabrielli, S., Rojas, P., Roselli, M., . . . Cancrini, G. (2016). Intestinal parasitic infections and associated epidemiological drivers in two rural communities of the Bolivian Chaco. In (Vol. 10, pp. 1012-1019)._x000D_ _x000D_
Bolivia	Bartolo, Departamento de Chuquisaca (municipality of Monteagudo, Hernando Siles Province)	112	57	Humano	ST3	1		PCR, mplification and sequencingto identify species/subtypes involve	2016	Macchioni et al	-19.8164	-63.9763	Macchioni, F., Segundo, H., Totino, V., Gabrielli, S., Rojas, P., Roselli, M., . . . Cancrini, G. (2016). Intestinal parasitic infections and associated epidemiological drivers in two rural communities of the Bolivian Chaco. In (Vol. 10, pp. 1012-1019)._x000D_ _x000D_
Bolivia	Ivamirapinta, Departamento de Santa Cruz (municipality of Gutierrez, Cordillera Province)	111	70	Humano	ST1	4		PCR, mplification and sequencingto identify species/subtypes involve	2016	Macchioni et al	-17.8146	-63.1561	"Macchioni, F., Segundo, H., Totino, V., Gabrielli, S., Rojas, P., Roselli, M., . . . Cancrini, G. (2016). Intestinal parasitic infections and associated epidemiological drivers in two rural communities of the Bolivian Chaco. In (Vol. 10, pp. 1012-1019). "_x000D_ _x000D_
Bolivia	Ivamirapinta, Departamento de Santa Cruz (municipality of Gutierrez, Cordillera Province)	111	70	Humano	ST2	2		PCR, mplification and sequencingto identify species/subtypes involve	2016	Macchioni et al	-17.8146	-63.1561	"Macchioni, F., Segundo, H., Totino, V., Gabrielli, S., Rojas, P., Roselli, M., . . . Cancrini, G. (2016). Intestinal parasitic infections and associated epidemiological drivers in two rural communities of the Bolivian Chaco. In (Vol. 10, pp. 1012-1019). "_x000D_ _x000D_
Bolivia	Ivamirapinta, Departamento de Santa Cruz (municipality of Gutierrez, Cordillera Province)	111	70	Humano	ST3	2		PCR, mplification and sequencingto identify species/subtypes involve	2016	Macchioni et al	-17.8146	-63.1561	"Macchioni, F., Segundo, H., Totino, V., Gabrielli, S., Rojas, P., Roselli, M., . . . Cancrini, G. (2016). Intestinal parasitic infections and associated epidemiological drivers in two rural communities of the Bolivian Chaco. In (Vol. 10, pp. 1012-1019). "_x000D_ _x000D_
Bolivia	Añimbo, Arenal, Brecha, Mandiyuti, Taputa, Timboirenda, Uruguay, Departamento de Santa Cruz	268	43	Humano	ST9	8		PCR, mplification and sequencingto identify species/subtypes involve	2015	Macchioni et al	-17.8146	-63.1561	Macchioni, F., Segundo, H., Gonzales, P. R., Salazar, E., Bozo, R., Gabrielli, S., . . . Bartoloni, A. (2015). Dramatic decrease in prevalence of soil-transmitted helminths and new insights into intestinal protozoa in children living in the Chaco Region, Bolivia. American Journal of Tropical Medicine and Hygiene, 92(4), 794-796.
Bolivia	Añimbo, Arenal, Brecha, Mandiyuti, Taputa, Timboirenda, Uruguay, Departamento de Santa Cruz	268	43	Humano	ST2	4		PCR, mplification and sequencingto identify species/subtypes involve	2015	Macchioni et al	-17.8146	-63.1561	Macchioni, F., Segundo, H., Gonzales, P. R., Salazar, E., Bozo, R., Gabrielli, S., . . . Bartoloni, A. (2015). Dramatic decrease in prevalence of soil-transmitted helminths and new insights into intestinal protozoa in children living in the Chaco Region, Bolivia. American Journal of Tropical Medicine and Hygiene, 92(4), 794-796.
Bolivia	Santa Cruz, Departamento	40	40	Humano	ST2	13		PCR amplification of Blastocystis-specific SSUr DNA using the primers RD5 (5′-ATCTGGTTGATCCTGCCAGT-3′) and BhRDr (5′-GAGCTTTTTAACTGCAACAACG-3′)	2016	Ramirez et al	-17.8146	-63.1561	Ramirez, J. D., Sanchez, A., Hernandez, C., Florez, C., Consuelo Bernal, M., Cesar Giraldo, J., . . . Casero, R. D. (2016). Geographic distribution of human Blastocystis subtypes in South America. In (Vol. 41, pp. 32-35).
Bolivia	Santa Cruz, Departamento	40	40	Humano	ST3	12		PCR amplification of Blastocystis-specific SSUr DNA using the primers RD5 (5′-ATCTGGTTGATCCTGCCAGT-3′) and BhRDr (5′-GAGCTTTTTAACTGCAACAACG-3′)	2016	Ramirez et al	-17.8146	-63.1561	Ramirez, J. D., Sanchez, A., Hernandez, C., Florez, C., Consuelo Bernal, M., Cesar Giraldo, J., . . . Casero, R. D. (2016). Geographic distribution of human Blastocystis subtypes in South America. In (Vol. 41, pp. 32-35).
Bolivia	Santa Cruz, Departamento	40	40	Humano	ST5	8		PCR amplification of Blastocystis-specific SSUr DNA using the primers RD5 (5′-ATCTGGTTGATCCTGCCAGT-3′) and BhRDr (5′-GAGCTTTTTAACTGCAACAACG-3′)	2016	Ramirez et al	-17.8146	-63.1561	Ramirez, J. D., Sanchez, A., Hernandez, C., Florez, C., Consuelo Bernal, M., Cesar Giraldo, J., . . . Casero, R. D. (2016). Geographic distribution of human Blastocystis subtypes in South America. In (Vol. 41, pp. 32-35).
Bolivia	Santa Cruz, Departamento	40	40	Humano	ST12	3		PCR amplification of Blastocystis-specific SSUr DNA using the primers RD5 (5′-ATCTGGTTGATCCTGCCAGT-3′) and BhRDr (5′-GAGCTTTTTAACTGCAACAACG-3′)	2016	Ramirez et al	-17.8146	-63.1561	Ramirez, J. D., Sanchez, A., Hernandez, C., Florez, C., Consuelo Bernal, M., Cesar Giraldo, J., . . . Casero, R. D. (2016). Geographic distribution of human Blastocystis subtypes in South America. In (Vol. 41, pp. 32-35).
Bolivia	Santa Cruz, Departamento	40	40	Humano	Novel ST	4		PCR amplification of Blastocystis-specific SSUr DNA using the primers RD5 (5′-ATCTGGTTGATCCTGCCAGT-3′) and BhRDr (5′-GAGCTTTTTAACTGCAACAACG-3′)	2016	Ramirez et al	-17.8146	-63.1561	Ramirez, J. D., Sanchez, A., Hernandez, C., Florez, C., Consuelo Bernal, M., Cesar Giraldo, J., . . . Casero, R. D. (2016). Geographic distribution of human Blastocystis subtypes in South America. In (Vol. 41, pp. 32-35).
Colombia	Unkown	12	12	Humano	ST1	5			2011	Santín et al	Unkown	Unkown	Santin, M., Teresa Gomez-Munoz, M., Solano-Aguilar, G., & Fayer, R. (2011). Development of a new PCR protocol to detect and subtype Blastocystis spp. from humans and animals. In (Vol. 109, pp. 205-212).
Colombia	Unkown	12	12	Humano	ST2	4			2011	Santín et al	Unkown	Unkown	Santin, M., Teresa Gomez-Munoz, M., Solano-Aguilar, G., & Fayer, R. (2011). Development of a new PCR protocol to detect and subtype Blastocystis spp. from humans and animals. In (Vol. 109, pp. 205-212).
Colombia	Unkown	12	12	Humano	ST3	4			2011	Santín et al	Unkown	Unkown	Santin, M., Teresa Gomez-Munoz, M., Solano-Aguilar, G., & Fayer, R. (2011). Development of a new PCR protocol to detect and subtype Blastocystis spp. from humans and animals. In (Vol. 109, pp. 205-212).
Colombia		181	181	Humano	ST1	82		PCR amplification of Blastocystis-specific SSUr DNA using the primers RD5 (5′-ATCTGGTTGATCCTGCCAGT-3′) and BhRDr (5′-GAGCTTTTTAACTGCAACAACG-3′)	2016	Ramirez et al			Ramirez, J. D., Sanchez, A., Hernandez, C., Florez, C., Consuelo Bernal, M., Cesar Giraldo, J., . . . Casero, R. D. (2016). Geographic distribution of human Blastocystis subtypes in South America. In (Vol. 41, pp. 32-35).
Colombia		181	181	Humano	ST2	47		PCR amplification of Blastocystis-specific SSUr DNA using the primers RD5 (5′-ATCTGGTTGATCCTGCCAGT-3′) and BhRDr (5′-GAGCTTTTTAACTGCAACAACG-3′)	2016	Ramirez et al			Ramirez, J. D., Sanchez, A., Hernandez, C., Florez, C., Consuelo Bernal, M., Cesar Giraldo, J., . . . Casero, R. D. (2016). Geographic distribution of human Blastocystis subtypes in South America. In (Vol. 41, pp. 32-35).
Colombia		181	181	Humano	ST3	33		PCR amplification of Blastocystis-specific SSUr DNA using the primers RD5 (5′-ATCTGGTTGATCCTGCCAGT-3′) and BhRDr (5′-GAGCTTTTTAACTGCAACAACG-3′)	2016	Ramirez et al			Ramirez, J. D., Sanchez, A., Hernandez, C., Florez, C., Consuelo Bernal, M., Cesar Giraldo, J., . . . Casero, R. D. (2016). Geographic distribution of human Blastocystis subtypes in South America. In (Vol. 41, pp. 32-35).
Colombia		181	181	Humano	ST4	7		PCR amplification of Blastocystis-specific SSUr DNA using the primers RD5 (5′-ATCTGGTTGATCCTGCCAGT-3′) and BhRDr (5′-GAGCTTTTTAACTGCAACAACG-3′)	2016	Ramirez et al			Ramirez, J. D., Sanchez, A., Hernandez, C., Florez, C., Consuelo Bernal, M., Cesar Giraldo, J., . . . Casero, R. D. (2016). Geographic distribution of human Blastocystis subtypes in South America. In (Vol. 41, pp. 32-35).
Colombia		181	181	Humano	ST6	4		PCR amplification of Blastocystis-specific SSUr DNA using the primers RD5 (5′-ATCTGGTTGATCCTGCCAGT-3′) and BhRDr (5′-GAGCTTTTTAACTGCAACAACG-3′)	2016	Ramirez et al			Ramirez, J. D., Sanchez, A., Hernandez, C., Florez, C., Consuelo Bernal, M., Cesar Giraldo, J., . . . Casero, R. D. (2016). Geographic distribution of human Blastocystis subtypes in South America. In (Vol. 41, pp. 32-35).
Colombia		181	181	Humano	ST7	7		PCR amplification of Blastocystis-specific SSUr DNA using the primers RD5 (5′-ATCTGGTTGATCCTGCCAGT-3′) and BhRDr (5′-GAGCTTTTTAACTGCAACAACG-3′)	2016	Ramirez et al			Ramirez, J. D., Sanchez, A., Hernandez, C., Florez, C., Consuelo Bernal, M., Cesar Giraldo, J., . . . Casero, R. D. (2016). Geographic distribution of human Blastocystis subtypes in South America. In (Vol. 41, pp. 32-35).
Colombia		181	181	Humano	Novel ST	1		PCR amplification of Blastocystis-specific SSUr DNA using the primers RD5 (5′-ATCTGGTTGATCCTGCCAGT-3′) and BhRDr (5′-GAGCTTTTTAACTGCAACAACG-3′)	2016	Ramirez et al			Ramirez, J. D., Sanchez, A., Hernandez, C., Florez, C., Consuelo Bernal, M., Cesar Giraldo, J., . . . Casero, R. D. (2016). Geographic distribution of human Blastocystis subtypes in South America. In (Vol. 41, pp. 32-35).
Colombia	Departamentos Boyaca, Casanare, Cundinamarca, Huila, Bogota, Santander, Vaupes	277	125	Humano	ST1	70	a2,4	PCR amplification of Blastocystis-specific SSU rDNA using the primers RD5 (50 ATCTGGTTG ATCCTGCCAGT30) and BhRDr (50 GAGCTTTTTAACTGCAACAACG30)	2014	Ramirez et al	Latitud: 5.19695_x000D_ Latitud: 4.74452_x000D_ Latitud: 5.167_x000D_ Latitud: 2.92504_x000D_ Latitud: 7.117_x000D_	Longitud: -73.1463_x000D_ Longitud: -74.5336_x000D_ Longitud: -72.55_x000D_ Longitud: -75.2897_x000D_ Longitud: -73.217_x000D_	Ramírez, J. D., Sánchez, L. V., Bautista, D. C., Corredor, A. F., Flórez, A. C., & Stensvold, C. R. (2014). Blastocystis subtypes detected in humans and animals from Colombia. Infection, Genetics & Evolution, 22, 223-228.
Colombia	Departamentos Boyaca, Casanare, Cundinamarca, Huila, Bogota, Santander, Vaupes	277	125	Humano	ST2	40	a9	PCR amplification of Blastocystis-specific SSU rDNA using the primers RD5 (50 ATCTGGTTG ATCCTGCCAGT30) and BhRDr (50 GAGCTTTTTAACTGCAACAACG30)	2014	Ramirez et al	Latitud: 5.19695_x000D_ Latitud: 4.74452_x000D_ Latitud: 5.167_x000D_ Latitud: 2.92504_x000D_ Latitud: 7.117_x000D_	Longitud: -73.1463_x000D_ Longitud: -74.5336_x000D_ Longitud: -72.55_x000D_ Longitud: -75.2897_x000D_ Longitud: -73.217_x000D_	Ramírez, J. D., Sánchez, L. V., Bautista, D. C., Corredor, A. F., Flórez, A. C., & Stensvold, C. R. (2014). Blastocystis subtypes detected in humans and animals from Colombia. Infection, Genetics & Evolution, 22, 223-228.
Colombia	Departamentos Boyaca, Casanare, Cundinamarca, Huila, Bogota, Santander, Vaupes	277	125	Humano	ST3	13	a34	PCR amplification of Blastocystis-specific SSU rDNA using the primers RD5 (50 ATCTGGTTG ATCCTGCCAGT30) and BhRDr (50 GAGCTTTTTAACTGCAACAACG30)	2014	Ramirez et al	Latitud: 5.19695_x000D_ Latitud: 4.74452_x000D_ Latitud: 5.167_x000D_ Latitud: 2.92504_x000D_ Latitud: 7.117_x000D_	Longitud: -73.1463_x000D_ Longitud: -74.5336_x000D_ Longitud: -72.55_x000D_ Longitud: -75.2897_x000D_ Longitud: -73.217_x000D_	Ramírez, J. D., Sánchez, L. V., Bautista, D. C., Corredor, A. F., Flórez, A. C., & Stensvold, C. R. (2014). Blastocystis subtypes detected in humans and animals from Colombia. Infection, Genetics & Evolution, 22, 223-228.
Colombia	Departamentos Boyaca, Casanare, Cundinamarca, Huila, Bogota, Santander, Vaupes	52	47	Aves	ST6	47	a122	PCR amplification of Blastocystis-specific SSU rDNA using the primers RD5 (50 ATCTGGTTG ATCCTGCCAGT30) and BhRDr (50 GAGCTTTTTAACTGCAACAACG30)	2014	Ramirez et al	Latitud: 5.19695_x000D_ Latitud: 4.74452_x000D_	Longitud: -73.1463_x000D_ Longitud: -74.5336_x000D_	Ramírez, J. D., Sánchez, L. V., Bautista, D. C., Corredor, A. F., Flórez, A. C., & Stensvold, C. R. (2014). Blastocystis subtypes detected in humans and animals from Colombia. Infection, Genetics & Evolution, 22, 223-228.
Colombia	Departamentos Boyaca, Casanare, Cundinamarca, Huila, Bogota, Santander, Vaupes	25	20	Ganado	ST1	12	a2,4	PCR amplification of Blastocystis-specific SSU rDNA using the primers RD5 (50 ATCTGGTTG ATCCTGCCAGT30) and BhRDr (50 GAGCTTTTTAACTGCAACAACG30)	2014	Ramirez et al	Latitud: 5.19695_x000D_ Latitud: 4.74452_x000D_ Latitud: 5.167_x000D_ Latitud: 7.117_x000D_	Longitud: -73.1463_x000D_ Longitud: -74.5336_x000D_ Longitud: -72.55_x000D_ Longitud: -73.217_x000D_	Ramírez, J. D., Sánchez, L. V., Bautista, D. C., Corredor, A. F., Flórez, A. C., & Stensvold, C. R. (2014). Blastocystis subtypes detected in humans and animals from Colombia. Infection, Genetics & Evolution, 22, 223-228.
Colombia	Departamentos Boyaca, Casanare, Cundinamarca, Huila, Bogota, Santander, Vaupes		20	Ganado	ST3	8	a34	PCR amplification of Blastocystis-specific SSU rDNA using the primers RD5 (50 ATCTGGTTG ATCCTGCCAGT30) and BhRDr (50 GAGCTTTTTAACTGCAACAACG30)	2014	Ramirez et al	Latitud: 5.19695_x000D_ Latitud: 4.74452_x000D_ Latitud: 5.167_x000D_ Latitud: 7.117_x000D_	Longitud: -73.1463_x000D_ Longitud: -74.5336_x000D_ Longitud: -72.55_x000D_ Longitud: -73.217_x000D_	Ramírez, J. D., Sánchez, L. V., Bautista, D. C., Corredor, A. F., Flórez, A. C., & Stensvold, C. R. (2014). Blastocystis subtypes detected in humans and animals from Colombia. Infection, Genetics & Evolution, 22, 223-228.
Colombia	Departamentos Boyaca, Casanare, Cundinamarca, Huila, Bogota, Santander, Vaupes	40	25	Didelphis marsupialis	ST8	25	a21	PCR amplification of Blastocystis-specific SSU rDNA using the primers RD5 (50 ATCTGGTTG ATCCTGCCAGT30) and BhRDr (50 GAGCTTTTTAACTGCAACAACG30)	2014	Ramirez et al	Latitud: 5.19695_x000D_ Latitud: 4.74452_x000D_ Latitud: 5.167_x000D_ Latitud: 7.117_x000D_	Longitud: -73.1463_x000D_ Longitud: -74.5336_x000D_ Longitud: -72.55_x000D_ Longitud: -73.217_x000D_	Ramírez, J. D., Sánchez, L. V., Bautista, D. C., Corredor, A. F., Flórez, A. C., & Stensvold, C. R. (2014). Blastocystis subtypes detected in humans and animals from Colombia. Infection, Genetics & Evolution, 22, 223-228.
Colombia	Departamentos Boyaca, Casanare, Cundinamarca, Huila, Bogota, Santander, Vaupes	40	15	Perro	ST2	15	a9	PCR amplification of Blastocystis-specific SSU rDNA using the primers RD5 (50 ATCTGGTTG ATCCTGCCAGT30) and BhRDr (50 GAGCTTTTTAACTGCAACAACG30)	2014	Ramirez et al	Latitud: 5.19695_x000D_ Latitud: 4.74452_x000D_ Latitud: 5.167_x000D_ Latitud: 7.117_x000D_	Longitud: -73.1463_x000D_ Longitud: -74.5336_x000D_ Longitud: -72.55_x000D_ Longitud: -73.217_x000D_	Ramírez, J. D., Sánchez, L. V., Bautista, D. C., Corredor, A. F., Flórez, A. C., & Stensvold, C. R. (2014). Blastocystis subtypes detected in humans and animals from Colombia. Infection, Genetics & Evolution, 22, 223-228.
Colombia	Departamentos Boyaca, Casanare, Cundinamarca, Huila, Bogota, Santander, Vaupes	10	3	Rattus rattus	ST2	3	a9	PCR amplification of Blastocystis-specific SSU rDNA using the primers RD5 (50 ATCTGGTTG ATCCTGCCAGT30) and BhRDr (50 GAGCTTTTTAACTGCAACAACG30)	2014	Ramirez et al	Latitud: 5.19695_x000D_ Latitud: 4.74452_x000D_ Latitud: 5.167_x000D_ Latitud: 7.117_x000D_	Longitud: -73.1463_x000D_ Longitud: -74.5336_x000D_ Longitud: -72.55_x000D_ Longitud: -73.217_x000D_	Ramírez, J. D., Sánchez, L. V., Bautista, D. C., Corredor, A. F., Flórez, A. C., & Stensvold, C. R. (2014). Blastocystis subtypes detected in humans and animals from Colombia. Infection, Genetics & Evolution, 22, 223-228.
Colombia	Departamentos Boyaca, Casanare, Cundinamarca, Huila, Bogota, Santander, Vaupes	2	2	Alouatta spp	ST4	2	a42, 133	PCR amplification of Blastocystis-specific SSU rDNA using the primers RD5 (50 ATCTGGTTG ATCCTGCCAGT30) and BhRDr (50 GAGCTTTTTAACTGCAACAACG30)	2014	Ramirez et al	Latitud: 5.19695_x000D_ Latitud: 4.74452_x000D_ Latitud: 5.167_x000D_ Latitud: 7.117_x000D_	Longitud: -73.1463_x000D_ Longitud: -74.5336_x000D_ Longitud: -72.55_x000D_ Longitud: -73.217_x000D_	Ramírez, J. D., Sánchez, L. V., Bautista, D. C., Corredor, A. F., Flórez, A. C., & Stensvold, C. R. (2014). Blastocystis subtypes detected in humans and animals from Colombia. Infection, Genetics & Evolution, 22, 223-228.
Colombia	Inirida, Departamento de Guainia	249	14	Humano	ST1	4	a1,2,4,81,82,83	"PCR amplification of Blastocystis-specific SSU rDNA using the primers RD5 (50 ATCTGGTTG ATCCTGCCAGT30 ) and BhRDr (50 GAGCTTTTTAACTGCAACAACG30)"_x000D_ _x000D_ _x000D_ _x000D_ _x000D_ _x000D_ _x000D_ _x000D_ _x000D_	2017	Ramirez et al	3.867	-67.917	Ramírez, J. D., Flórez, C., Olivera, M., Bernal, M. C., & Giraldo, J. C. (2017). Blastocystis subtyping and its association with intestinal parasites in children from different geographical regions of Colombia. PLoS ONE, 12(2), 1-13.
Colombia	Inirida, Departamento de Guainia	249	14	Humano	ST2	2	a9,12,15,67,71,73	"PCR amplification of Blastocystis-specific SSU rDNA using the primers RD5 (50 ATCTGGTTG ATCCTGCCAGT30 ) and BhRDr (50 GAGCTTTTTAACTGCAACAACG30)"_x000D_ _x000D_ _x000D_ _x000D_ _x000D_ _x000D_ _x000D_ _x000D_ _x000D_	2017	Ramirez et al	3.867	-67.917	Ramírez, J. D., Flórez, C., Olivera, M., Bernal, M. C., & Giraldo, J. C. (2017). Blastocystis subtyping and its association with intestinal parasites in children from different geographical regions of Colombia. PLoS ONE, 12(2), 1-13.
Colombia	Inirida, Departamento de Guainia	249	14	Humano	ST3	8	a34,36,37,38,45,49,55,134,128	"PCR amplification of Blastocystis-specific SSU rDNA using the primers RD5 (50 ATCTGGTTG ATCCTGCCAGT30 ) and BhRDr (50 GAGCTTTTTAACTGCAACAACG30)"_x000D_ _x000D_ _x000D_ _x000D_ _x000D_ _x000D_ _x000D_ _x000D_ _x000D_	2017	Ramirez et al	3.867	-67.917	Ramírez, J. D., Flórez, C., Olivera, M., Bernal, M. C., & Giraldo, J. C. (2017). Blastocystis subtyping and its association with intestinal parasites in children from different geographical regions of Colombia. PLoS ONE, 12(2), 1-13.
Colombia	Guamo, Departamento de Tolima	222	36	Humano	ST1	24	a1,2,4,81,82,83	"PCR amplification of Blastocystis-specific SSU rDNA using the primers RD5 (50 ATCTGGTTG ATCCTGCCAGT30 ) and BhRDr (50 GAGCTTTTTAACTGCAACAACG30)"_x000D_ _x000D_ _x000D_ _x000D_ _x000D_ _x000D_ _x000D_ _x000D_ _x000D_	2017	Ramirez et al	4.017	-74.967	Ramírez, J. D., Flórez, C., Olivera, M., Bernal, M. C., & Giraldo, J. C. (2017). Blastocystis subtyping and its association with intestinal parasites in children from different geographical regions of Colombia. PLoS ONE, 12(2), 1-13.
Colombia	Guamo, Departamento de Tolima	222	36	Humano	ST2	8	a9,12,15,67,71,73	"PCR amplification of Blastocystis-specific SSU rDNA using the primers RD5 (50 ATCTGGTTG ATCCTGCCAGT30 ) and BhRDr (50 GAGCTTTTTAACTGCAACAACG30)"_x000D_ _x000D_ _x000D_ _x000D_ _x000D_ _x000D_ _x000D_ _x000D_ _x000D_	2017	Ramirez et al	4.017	-74.967	Ramírez, J. D., Flórez, C., Olivera, M., Bernal, M. C., & Giraldo, J. C. (2017). Blastocystis subtyping and its association with intestinal parasites in children from different geographical regions of Colombia. PLoS ONE, 12(2), 1-13.
Colombia	Guamo, Departamento de Tolima	222	36	Humano	ST3	4	a34,36,37,38,45,49,55,134,128	"PCR amplification of Blastocystis-specific SSU rDNA using the primers RD5 (50 ATCTGGTTG ATCCTGCCAGT30 ) and BhRDr (50 GAGCTTTTTAACTGCAACAACG30)"_x000D_ _x000D_ _x000D_ _x000D_ _x000D_ _x000D_ _x000D_ _x000D_ _x000D_	2017	Ramirez et al	4.017	-74.967	Ramírez, J. D., Flórez, C., Olivera, M., Bernal, M. C., & Giraldo, J. C. (2017). Blastocystis subtyping and its association with intestinal parasites in children from different geographical regions of Colombia. PLoS ONE, 12(2), 1-13.
Colombia	Coyaima, Departamento de Tolima	213	30	Humano	ST2	8	a9,12,15,67,71,73	"PCR amplification of Blastocystis-specific SSU rDNA using the primers RD5 (50 ATCTGGTTG ATCCTGCCAGT30 ) and BhRDr (50 GAGCTTTTTAACTGCAACAACG30)"_x000D_ _x000D_ _x000D_ _x000D_ _x000D_ _x000D_ _x000D_ _x000D_ _x000D_	2017	Ramirez et al	3.79694	-75.1946	Ramírez, J. D., Flórez, C., Olivera, M., Bernal, M. C., & Giraldo, J. C. (2017). Blastocystis subtyping and its association with intestinal parasites in children from different geographical regions of Colombia. PLoS ONE, 12(2), 1-13.
Colombia	Coyaima, Departamento de Tolima	213	30	Humano	ST3	22	a34,36,37,38,45,49,55,134,128	"PCR amplification of Blastocystis-specific SSU rDNA using the primers RD5 (50 ATCTGGTTG ATCCTGCCAGT30 ) and BhRDr (50 GAGCTTTTTAACTGCAACAACG30)"_x000D_ _x000D_ _x000D_ _x000D_ _x000D_ _x000D_ _x000D_ _x000D_ _x000D_	2017	Ramirez et al	3.79694	-75.1946	Ramírez, J. D., Flórez, C., Olivera, M., Bernal, M. C., & Giraldo, J. C. (2017). Blastocystis subtyping and its association with intestinal parasites in children from different geographical regions of Colombia. PLoS ONE, 12(2), 1-13.
Colombia	Calarca, Deoartamento de Quindio	178	24	Humano	ST3	20	a34,36,37,38,45,49,55,134,128	"PCR amplification of Blastocystis-specific SSU rDNA using the primers RD5 (50 ATCTGGTTG ATCCTGCCAGT30 ) and BhRDr (50 GAGCTTTTTAACTGCAACAACG30)"_x000D_ _x000D_ _x000D_ _x000D_ _x000D_ _x000D_ _x000D_ _x000D_ _x000D_	2017	Ramirez et al	4.53194	-75.6503	Ramírez, J. D., Flórez, C., Olivera, M., Bernal, M. C., & Giraldo, J. C. (2017). Blastocystis subtyping and its association with intestinal parasites in children from different geographical regions of Colombia. PLoS ONE, 12(2), 1-13.
Colombia	Calarca, Deoartamento de Quindio	178	24	Humano	ST4	2	a42	"PCR amplification of Blastocystis-specific SSU rDNA using the primers RD5 (50 ATCTGGTTG ATCCTGCCAGT30 ) and BhRDr (50 GAGCTTTTTAACTGCAACAACG30)"_x000D_ _x000D_ _x000D_ _x000D_ _x000D_ _x000D_ _x000D_ _x000D_ _x000D_	2017	Ramirez et al	4.53194	-75.6503	Ramírez, J. D., Flórez, C., Olivera, M., Bernal, M. C., & Giraldo, J. C. (2017). Blastocystis subtyping and its association with intestinal parasites in children from different geographical regions of Colombia. PLoS ONE, 12(2), 1-13.
Colombia	Calarca, Deoartamento de Quindio	178	24	Humano	ST6	2	a122	"PCR amplification of Blastocystis-specific SSU rDNA using the primers RD5 (50 ATCTGGTTG ATCCTGCCAGT30 ) and BhRDr (50 GAGCTTTTTAACTGCAACAACG30)"_x000D_ _x000D_ _x000D_ _x000D_ _x000D_ _x000D_ _x000D_ _x000D_ _x000D_	2017	Ramirez et al	4.53194	-75.6503	Ramírez, J. D., Flórez, C., Olivera, M., Bernal, M. C., & Giraldo, J. C. (2017). Blastocystis subtyping and its association with intestinal parasites in children from different geographical regions of Colombia. PLoS ONE, 12(2), 1-13.
Colombia	Armenia, Departamento Quindio	333	30	Humano	ST1	12	a1,2,4,81,82,83	"PCR amplification of Blastocystis-specific SSU rDNA using the primers RD5 (50 ATCTGGTTG ATCCTGCCAGT30 ) and BhRDr (50 GAGCTTTTTAACTGCAACAACG30)"_x000D_ _x000D_ _x000D_ _x000D_ _x000D_ _x000D_ _x000D_ _x000D_ _x000D_	2017	Ramirez et al	-75.7043800	4.5330700	Ramírez, J. D., Flórez, C., Olivera, M., Bernal, M. C., & Giraldo, J. C. (2017). Blastocystis subtyping and its association with intestinal parasites in children from different geographical regions of Colombia. PLoS ONE, 12(2), 1-13.
Colombia	Armenia, Departamento Quindio	333	30	Humano	ST3	13	a34,36,37,38,45,49,55,134,128	"PCR amplification of Blastocystis-specific SSU rDNA using the primers RD5 (50 ATCTGGTTG ATCCTGCCAGT30 ) and BhRDr (50 GAGCTTTTTAACTGCAACAACG30)"_x000D_ _x000D_ _x000D_ _x000D_ _x000D_ _x000D_ _x000D_ _x000D_ _x000D_	2017	Ramirez et al	-75.7043800	4.5330700	Ramírez, J. D., Flórez, C., Olivera, M., Bernal, M. C., & Giraldo, J. C. (2017). Blastocystis subtyping and its association with intestinal parasites in children from different geographical regions of Colombia. PLoS ONE, 12(2), 1-13.
Colombia	Armenia, Departamento Quindio	333	30	Humano	ST6	3	a122	"PCR amplification of Blastocystis-specific SSU rDNA using the primers RD5 (50 ATCTGGTTG ATCCTGCCAGT30 ) and BhRDr (50 GAGCTTTTTAACTGCAACAACG30)"_x000D_ _x000D_ _x000D_ _x000D_ _x000D_ _x000D_ _x000D_ _x000D_ _x000D_	2017	Ramirez et al	-75.7043800	4.5330700	Ramírez, J. D., Flórez, C., Olivera, M., Bernal, M. C., & Giraldo, J. C. (2017). Blastocystis subtyping and its association with intestinal parasites in children from different geographical regions of Colombia. PLoS ONE, 12(2), 1-13.
Colombia	Armenia, Departamento Quindio	333	30	Humano	ST7	2	a142	"PCR amplification of Blastocystis-specific SSU rDNA using the primers RD5 (50 ATCTGGTTG ATCCTGCCAGT30 ) and BhRDr (50 GAGCTTTTTAACTGCAACAACG30)"_x000D_ _x000D_ _x000D_ _x000D_ _x000D_ _x000D_ _x000D_ _x000D_ _x000D_	2017	Ramirez et al	-75.7043800	4.5330700	Ramírez, J. D., Flórez, C., Olivera, M., Bernal, M. C., & Giraldo, J. C. (2017). Blastocystis subtyping and its association with intestinal parasites in children from different geographical regions of Colombia. PLoS ONE, 12(2), 1-13.
Colombia	Bogotá, Departamento de Cundinamarca	275	31	Humano	ST1	1	a1,2,4,81,82,83	"PCR amplification of Blastocystis-specific SSU rDNA using the primers RD5 (50 ATCTGGTTG ATCCTGCCAGT30 ) and BhRDr (50 GAGCTTTTTAACTGCAACAACG30)"_x000D_ _x000D_ _x000D_ _x000D_ _x000D_ _x000D_ _x000D_ _x000D_ _x000D_	2017	Ramirez et al	5.77894	-74.217	Ramírez, J. D., Flórez, C., Olivera, M., Bernal, M. C., & Giraldo, J. C. (2017). Blastocystis subtyping and its association with intestinal parasites in children from different geographical regions of Colombia. PLoS ONE, 12(2), 1-13.
Colombia	Bogotá, Departamento de Cundinamarca	275	31	Humano	ST2	16	a9,12,15,67,71,73	"PCR amplification of Blastocystis-specific SSU rDNA using the primers RD5 (50 ATCTGGTTG ATCCTGCCAGT30 ) and BhRDr (50 GAGCTTTTTAACTGCAACAACG30)"_x000D_ _x000D_ _x000D_ _x000D_ _x000D_ _x000D_ _x000D_ _x000D_ _x000D_	2017	Ramirez et al	5.77894	-74.217	Ramírez, J. D., Flórez, C., Olivera, M., Bernal, M. C., & Giraldo, J. C. (2017). Blastocystis subtyping and its association with intestinal parasites in children from different geographical regions of Colombia. PLoS ONE, 12(2), 1-13.
Colombia	Bogotá, Departamento de Cundinamarca	275	31	Humano	ST3	14	a34,36,37,38,45,49,55,134,128	"PCR amplification of Blastocystis-specific SSU rDNA using the primers RD5 (50 ATCTGGTTG ATCCTGCCAGT30 ) and BhRDr (50 GAGCTTTTTAACTGCAACAACG30)"_x000D_ _x000D_ _x000D_ _x000D_ _x000D_ _x000D_ _x000D_ _x000D_ _x000D_	2017	Ramirez et al	5.77894	-74.217	Ramírez, J. D., Flórez, C., Olivera, M., Bernal, M. C., & Giraldo, J. C. (2017). Blastocystis subtyping and its association with intestinal parasites in children from different geographical regions of Colombia. PLoS ONE, 12(2), 1-13.
Colombia	Soacha, Departamento de Cundinamarca	200	26	Humano	ST1	3	a1,2,4,81,82,83	"PCR amplification of Blastocystis-specific SSU rDNA using the primers RD5 (50 ATCTGGTTG ATCCTGCCAGT30 ) and BhRDr (50 GAGCTTTTTAACTGCAACAACG30)"_x000D_ _x000D_ _x000D_ _x000D_ _x000D_ _x000D_ _x000D_ _x000D_ _x000D_	2017	Ramirez et al	5.77894	-74.217	Ramírez, J. D., Flórez, C., Olivera, M., Bernal, M. C., & Giraldo, J. C. (2017). Blastocystis subtyping and its association with intestinal parasites in children from different geographical regions of Colombia. PLoS ONE, 12(2), 1-13.
Colombia	Soacha, Departamento de Cundinamarca	200	26	Humano	ST2	3	a9,12,15,67,71,73	"PCR amplification of Blastocystis-specific SSU rDNA using the primers RD5 (50 ATCTGGTTG ATCCTGCCAGT30 ) and BhRDr (50 GAGCTTTTTAACTGCAACAACG30)"_x000D_ _x000D_ _x000D_ _x000D_ _x000D_ _x000D_ _x000D_ _x000D_ _x000D_	2017	Ramirez et al	5.77894	-74.217	Ramírez, J. D., Flórez, C., Olivera, M., Bernal, M. C., & Giraldo, J. C. (2017). Blastocystis subtyping and its association with intestinal parasites in children from different geographical regions of Colombia. PLoS ONE, 12(2), 1-13.
Colombia	Soacha, Departamento de Cundinamarca	200	26	Humano	ST3	20	a34,36,37,38,45,49,55,134,128	"PCR amplification of Blastocystis-specific SSU rDNA using the primers RD5 (50 ATCTGGTTG ATCCTGCCAGT30 ) and BhRDr (50 GAGCTTTTTAACTGCAACAACG30)"_x000D_ _x000D_ _x000D_ _x000D_ _x000D_ _x000D_ _x000D_ _x000D_ _x000D_	2017	Ramirez et al	5.77894	-74.217	Ramírez, J. D., Flórez, C., Olivera, M., Bernal, M. C., & Giraldo, J. C. (2017). Blastocystis subtyping and its association with intestinal parasites in children from different geographical regions of Colombia. PLoS ONE, 12(2), 1-13.
Colombia	Paipa, Departamento de Boyaca	248	45	Humano	ST1	11	a1,2,4,81,82,83	"PCR amplification of Blastocystis-specific SSU rDNA using the primers RD5 (50 ATCTGGTTG ATCCTGCCAGT30 ) and BhRDr (50 GAGCTTTTTAACTGCAACAACG30)"_x000D_ _x000D_ _x000D_ _x000D_ _x000D_ _x000D_ _x000D_ _x000D_ _x000D_	2017	Ramirez et al	5.77894	-73.1185	Ramírez, J. D., Flórez, C., Olivera, M., Bernal, M. C., & Giraldo, J. C. (2017). Blastocystis subtyping and its association with intestinal parasites in children from different geographical regions of Colombia. PLoS ONE, 12(2), 1-13.
Colombia	Paipa, Departamento de Boyaca	248	45	Humano	ST2	13	a9,12,15,67,71,73	"PCR amplification of Blastocystis-specific SSU rDNA using the primers RD5 (50 ATCTGGTTG ATCCTGCCAGT30 ) and BhRDr (50 GAGCTTTTTAACTGCAACAACG30)"_x000D_ _x000D_ _x000D_ _x000D_ _x000D_ _x000D_ _x000D_ _x000D_ _x000D_	2017	Ramirez et al	5.77894	-73.1185	Ramírez, J. D., Flórez, C., Olivera, M., Bernal, M. C., & Giraldo, J. C. (2017). Blastocystis subtyping and its association with intestinal parasites in children from different geographical regions of Colombia. PLoS ONE, 12(2), 1-13.
Colombia	Paipa, Departamento de Boyaca	248	45	Humano	ST3	21	a34,36,37,38,45,49,55,134,128	"PCR amplification of Blastocystis-specific SSU rDNA using the primers RD5 (50 ATCTGGTTG ATCCTGCCAGT30 ) and BhRDr (50 GAGCTTTTTAACTGCAACAACG30)"_x000D_ _x000D_ _x000D_ _x000D_ _x000D_ _x000D_ _x000D_ _x000D_ _x000D_	2017	Ramirez et al	5.77894	-73.1185	Ramírez, J. D., Flórez, C., Olivera, M., Bernal, M. C., & Giraldo, J. C. (2017). Blastocystis subtyping and its association with intestinal parasites in children from different geographical regions of Colombia. PLoS ONE, 12(2), 1-13.
Colombia	Nuevo Paraiso, Departamento del Amazonas	31	24	Humano	ST1	12	a4		2017	Sanchez et al	-1.02622	-74.0486	Sánchez, A., Gómez, N., Tabares, J., Segura, L., Salazar, Á., Restrepo, C., . . . David Ramírez, J. (2017). Comparación de resultados por microscopía comparada con qPCR y caracterización molecular de parásitos intestinales en menores de 15 años de una comunidad indígena del Amazonas, Colombia. (Spanish). Biomédica: Revista del Instituto Nacional de Salud, 37, 197.
Colombia	Nuevo Paraiso, Departamento del Amazonas	31	24	Humano	ST2	5	a12,71		2017	Sanchez et al	-1.02622	-74.0486	Sánchez, A., Gómez, N., Tabares, J., Segura, L., Salazar, Á., Restrepo, C., . . . David Ramírez, J. (2017). Comparación de resultados por microscopía comparada con qPCR y caracterización molecular de parásitos intestinales en menores de 15 años de una comunidad indígena del Amazonas, Colombia. (Spanish). Biomédica: Revista del Instituto Nacional de Salud, 37, 197.
Colombia	Nuevo Paraiso, Departamento del Amazonas	31	24	Humano	ST3	5	a36		2017	Sanchez et al	-1.02622	-74.0486	Sánchez, A., Gómez, N., Tabares, J., Segura, L., Salazar, Á., Restrepo, C., . . . David Ramírez, J. (2017). Comparación de resultados por microscopía comparada con qPCR y caracterización molecular de parásitos intestinales en menores de 15 años de una comunidad indígena del Amazonas, Colombia. (Spanish). Biomédica: Revista del Instituto Nacional de Salud, 37, 197.
Colombia	Nuevo Paraiso, Departamento del Amazonas	31	24	Humano	ST4	2	a42		2017	Sanchez et al	-1.02622	-74.0486	Sánchez, A., Gómez, N., Tabares, J., Segura, L., Salazar, Á., Restrepo, C., . . . David Ramírez, J. (2017). Comparación de resultados por microscopía comparada con qPCR y caracterización molecular de parásitos intestinales en menores de 15 años de una comunidad indígena del Amazonas, Colombia. (Spanish). Biomédica: Revista del Instituto Nacional de Salud, 37, 197.
Colombia	Villa Andrea, Departamento del Amazonas	43	30	Humano	ST1	11	a4		2017	Sanchez et al	-3.76286	-70.3745	Sánchez, A., Gómez, N., Tabares, J., Segura, L., Salazar, Á., Restrepo, C., . . . David Ramírez, J. (2017). Comparación de resultados por microscopía comparada con qPCR y caracterización molecular de parásitos intestinales en menores de 15 años de una comunidad indígena del Amazonas, Colombia. (Spanish). Biomédica: Revista del Instituto Nacional de Salud, 37, 197.
Colombia	Villa Andrea, Departamento del Amazonas	43	30	Humano	ST2	8	a11,15		2017	Sanchez et al	-3.76286	-70.3745	Sánchez, A., Gómez, N., Tabares, J., Segura, L., Salazar, Á., Restrepo, C., . . . David Ramírez, J. (2017). Comparación de resultados por microscopía comparada con qPCR y caracterización molecular de parásitos intestinales en menores de 15 años de una comunidad indígena del Amazonas, Colombia. (Spanish). Biomédica: Revista del Instituto Nacional de Salud, 37, 197.
Colombia	Villa Andrea, Departamento del Amazonas	43	30	Humano	ST3	10	a34,54		2017	Sanchez et al	-3.76286	-70.3745	Sánchez, A., Gómez, N., Tabares, J., Segura, L., Salazar, Á., Restrepo, C., . . . David Ramírez, J. (2017). Comparación de resultados por microscopía comparada con qPCR y caracterización molecular de parásitos intestinales en menores de 15 años de una comunidad indígena del Amazonas, Colombia. (Spanish). Biomédica: Revista del Instituto Nacional de Salud, 37, 197.
Colombia	Puerto Nariño, Departamento del Amazonas	130	85	Humano	ST1	4	a4,81		2017	Sanchez et al	-3.76286	-70.3745	Sánchez, A., Gómez, N., Tabares, J., Segura, L., Salazar, Á., Restrepo, C., . . . David Ramírez, J. (2017). Comparación de resultados por microscopía comparada con qPCR y caracterización molecular de parásitos intestinales en menores de 15 años de una comunidad indígena del Amazonas, Colombia. (Spanish). Biomédica: Revista del Instituto Nacional de Salud, 37, 197.
Colombia	Puerto Nariño, Departamento del Amazonas	130	85	Humano	ST2	27	a11,15		2017	Sanchez et al	-3.76286	-70.3745	Sánchez, A., Gómez, N., Tabares, J., Segura, L., Salazar, Á., Restrepo, C., . . . David Ramírez, J. (2017). Comparación de resultados por microscopía comparada con qPCR y caracterización molecular de parásitos intestinales en menores de 15 años de una comunidad indígena del Amazonas, Colombia. (Spanish). Biomédica: Revista del Instituto Nacional de Salud, 37, 197.
Colombia	Puerto Nariño, Departamento del Amazonas	130	85	Humano	ST3	27	a30,34,38		2017	Sanchez et al	-3.76286	-70.3745	Sánchez, A., Gómez, N., Tabares, J., Segura, L., Salazar, Á., Restrepo, C., . . . David Ramírez, J. (2017). Comparación de resultados por microscopía comparada con qPCR y caracterización molecular de parásitos intestinales en menores de 15 años de una comunidad indígena del Amazonas, Colombia. (Spanish). Biomédica: Revista del Instituto Nacional de Salud, 37, 197.
Colombia	Puerto Nariño, Departamento del Amazonas	130	85	Humano	ST4	4	a42		2017	Sanchez et al	-3.76286	-70.3745	Sánchez, A., Gómez, N., Tabares, J., Segura, L., Salazar, Á., Restrepo, C., . . . David Ramírez, J. (2017). Comparación de resultados por microscopía comparada con qPCR y caracterización molecular de parásitos intestinales en menores de 15 años de una comunidad indígena del Amazonas, Colombia. (Spanish). Biomédica: Revista del Instituto Nacional de Salud, 37, 197.
Colombia	Puerto Nariño, Departamento del Amazonas	130	85	Humano	ST6	1			2017	Sanchez et al	-3.76286	-70.3745	Sánchez, A., Gómez, N., Tabares, J., Segura, L., Salazar, Á., Restrepo, C., . . . David Ramírez, J. (2017). Comparación de resultados por microscopía comparada con qPCR y caracterización molecular de parásitos intestinales en menores de 15 años de una comunidad indígena del Amazonas, Colombia. (Spanish). Biomédica: Revista del Instituto Nacional de Salud, 37, 197.
Colombia	San Juan del Soco, Departamento del Amazonas	80	55	Humano	ST1	8	a4		2017	Sanchez et al	-3.76286	-70.3745	Sánchez, A., Gómez, N., Tabares, J., Segura, L., Salazar, Á., Restrepo, C., . . . David Ramírez, J. (2017). Comparación de resultados por microscopía comparada con qPCR y caracterización molecular de parásitos intestinales en menores de 15 años de una comunidad indígena del Amazonas, Colombia. (Spanish). Biomédica: Revista del Instituto Nacional de Salud, 37, 197.
Colombia	San Juan del Soco, Departamento del Amazonas	80	55	Humano	ST2	21	a9,12,62		2017	Sanchez et al	-3.76286	-70.3745	Sánchez, A., Gómez, N., Tabares, J., Segura, L., Salazar, Á., Restrepo, C., . . . David Ramírez, J. (2017). Comparación de resultados por microscopía comparada con qPCR y caracterización molecular de parásitos intestinales en menores de 15 años de una comunidad indígena del Amazonas, Colombia. (Spanish). Biomédica: Revista del Instituto Nacional de Salud, 37, 197.
Colombia	San Juan del Soco, Departamento del Amazonas	80	55	Humano	ST3	25	a30,36,38,60		2017	Sanchez et al	-3.76286	-70.3745	Sánchez, A., Gómez, N., Tabares, J., Segura, L., Salazar, Á., Restrepo, C., . . . David Ramírez, J. (2017). Comparación de resultados por microscopía comparada con qPCR y caracterización molecular de parásitos intestinales en menores de 15 años de una comunidad indígena del Amazonas, Colombia. (Spanish). Biomédica: Revista del Instituto Nacional de Salud, 37, 197.
Colombia	San Juan del Soco, Departamento del Amazonas	80	55	Humano	ST4	1	a42		2017	Sanchez et al	-3.76286	-70.3745	Sánchez, A., Gómez, N., Tabares, J., Segura, L., Salazar, Á., Restrepo, C., . . . David Ramírez, J. (2017). Comparación de resultados por microscopía comparada con qPCR y caracterización molecular de parásitos intestinales en menores de 15 años de una comunidad indígena del Amazonas, Colombia. (Spanish). Biomédica: Revista del Instituto Nacional de Salud, 37, 197.
Colombia	Ibague, Ciudad	100	48	Humano	ST1	20		PCR of the Small Subunit Ribonucleic Acid (SSU rRNA) gene. Positive samples involved PCR of the Small Subunit Ribonucleic Acid (SSU rRNA) gene. Positive samples involved PCR of the Small Subunit Ribonucleic Acid (SSU rRNA) gene. Positive samples involved PCR of the Small Subunit Ribonucleic Acid (SSU rRNA) gene. Positive samples involved PCR of the Small Subunit Ribonucleic Acid (SSU rRNA) gene. …	2019	Potes et al	4.433	-75.217	Potes, C., Osorio, L., Carranza, J.C., Vallejo, G. A., (2019) Detection and molecular characterisation of Blastocystis spp. in human faecal samples from Igagué, Colombia. 2nd International Blastocystis Conference
Colombia	Ibague, Ciudad	100	48	Humano	ST2	21		PCR of the Small Subunit Ribonucleic Acid (SSU rRNA) gene. Positive samples involved PCR of the Small Subunit Ribonucleic Acid (SSU rRNA) gene. Positive samples involved PCR of the Small Subunit Ribonucleic Acid (SSU rRNA) gene. Positive samples involved PCR of the Small Subunit Ribonucleic Acid (SSU rRNA) gene. Positive samples involved PCR of the Small Subunit Ribonucleic Acid (SSU rRNA) gene. …	2019	Potes et al	4.433	-75.217	Potes, C., Osorio, L., Carranza, J.C., Vallejo, G. A., (2019) Detection and molecular characterisation of Blastocystis spp. in human faecal samples from Igagué, Colombia.
Colombia	Ibague, Ciudad	100	48	Humano	ST3	7		PCR of the Small Subunit Ribonucleic Acid (SSU rRNA) gene. Positive samples involved PCR of the Small Subunit Ribonucleic Acid (SSU rRNA) gene. Positive samples involved PCR of the Small Subunit Ribonucleic Acid (SSU rRNA) gene. Positive samples involved PCR of the Small Subunit Ribonucleic Acid (SSU rRNA) gene. Positive samples involved PCR of the Small Subunit Ribonucleic Acid (SSU rRNA) gene. …	2019	Potes et al	4.433	-75.217	Potes, C., Osorio, L., Carranza, J.C., Vallejo, G. A., (2019) Detection and molecular characterisation of Blastocystis spp. in human faecal samples from Igagué, Colombia.
Colombia	Popayán, Departamento Cauca	266	62	Humano	ST1	24	a4,8,80,87	real-time PCR (qPCR) molecular characterization was carried out performing the amplification and sequencing of a fragment of the gene of the small subunit of ribosomal RNA	2019	Villamizar et al	2.433	-76.617	Villamizae, X., Vasquez, L., Ramirez, J. D. (2019) Prevalence of Blastocystisin children and canine population of the commune eight of Popayán (Cauca, Colombia). 2nd International Blastocystis Conference
Colombia	Popayán, Departamento Cauca	266	62	Humano	ST2	9	a11,12,15	real-time PCR (qPCR) molecular characterization was carried out performing the amplification and sequencing of a fragment of the gene of the small subunit of ribosomal RNA	2019	Villamizar et al	2.433	-76.617	Villamizae, X., Vasquez, L., Ramirez, J. D. (2019) Prevalence of Blastocystisin children and canine population of the commune eight of Popayán (Cauca, Colombia)
Colombia	Popayán, Departamento Cauca	266	62	Humano	ST3	27	a34,38,55,57	real-time PCR (qPCR) molecular characterization was carried out performing the amplification and sequencing of a fragment of the gene of the small subunit of ribosomal RNA	2019	Villamizar et al	2.433	-76.617	Villamizae, X., Vasquez, L., Ramirez, J. D. (2019) Prevalence of Blastocystisin children and canine population of the commune eight of Popayán (Cauca, Colombia)
Colombia	Popayán, Departamento Cauca	266	62	Humano	ST4	2	a42,91	real-time PCR (qPCR) molecular characterization was carried out performing the amplification and sequencing of a fragment of the gene of the small subunit of ribosomal RNA	2019	Villamizar et al	2.433	-76.617	Villamizae, X., Vasquez, L., Ramirez, J. D. (2019) Prevalence of Blastocystisin children and canine population of the commune eight of Popayán (Cauca, Colombia)
Chile	Santiago de Chile	37	4	Humano	ST1	2		Sequence analyses of the ~600 bp .amplified fragments obtained	2019	Peña et al	-33.4372	-70.6506	Peña, S., Carrasco, G., Rojas, P., Gotteland, M., Castillo, D., Ozaki, L. S., Mercado, R. (2018) Diferent Subtypes of Blastocystis hominis (ST1, ST2 and ST4) are present in Chilean patients with Inflamatory Bowel Disease. 2nd International Blastocystis Conference
Chile	Santiago de Chile	37	4	Humano	ST2	1		Sequence analyses of the ~600 bp .amplified fragments obtained	2019	Peña et al	-33.4372	-70.6506	Peña, S., Carrasco, G., Rojas, P., Gotteland, M., Castillo, D., Ozaki, L. S., Mercado, R. (2018) Diferent Subtypes of Blastocystis hominis (ST1, ST2 and ST4) are present in Chilean patients with Inflamatory Bowel Disease.
Chile	Santiago de Chile	37	4	Humano	ST4	1		Sequence analyses of the ~600 bp .amplified fragments obtained	2019	Peña et al	-33.4372	-70.6506	Peña, S., Carrasco, G., Rojas, P., Gotteland, M., Castillo, D., Ozaki, L. S., Mercado, R. (2018) Diferent Subtypes of Blastocystis hominis (ST1, ST2 and ST4) are present in Chilean patients with Inflamatory Bowel Disease.
Ecuador	Quito, Ciudad	25	25	Humano	ST1	3		PCR amplification of Blastocystis-specific SSUr DNA using the primers RD5 (5′-ATCTGGTTGATCCTGCCAGT-3′) and BhRDr (5′-GAGCTTTTTAACTGCAACAACG-3′)	2016	Ramirez et al	-0.225219	-78.5248	Ramirez, J. D., Sanchez, A., Hernandez, C., Florez, C., Consuelo Bernal, M., Cesar Giraldo, J., . . . Casero, R. D. (2016). Geographic distribution of human Blastocystis subtypes in South America. In (Vol. 41, pp. 32-35).
Ecuador	Quito, Ciudad	25	25	Humano	ST3	21		PCR amplification of Blastocystis-specific SSUr DNA using the primers RD5 (5′-ATCTGGTTGATCCTGCCAGT-3′) and BhRDr (5′-GAGCTTTTTAACTGCAACAACG-3′)	2016	Ramirez et al	-0.225219	-78.5248	Ramirez, J. D., Sanchez, A., Hernandez, C., Florez, C., Consuelo Bernal, M., Cesar Giraldo, J., . . . Casero, R. D. (2016). Geographic distribution of human Blastocystis subtypes in South America. In (Vol. 41, pp. 32-35).
Ecuador	Quito, Ciudad	25	25	Humano	Novel ST	1		PCR amplification of Blastocystis-specific SSUr DNA using the primers RD5 (5′-ATCTGGTTGATCCTGCCAGT-3′) and BhRDr (5′-GAGCTTTTTAACTGCAACAACG-3′)	2016	Ramirez et al	-0.225219	-78.5248	Ramirez, J. D., Sanchez, A., Hernandez, C., Florez, C., Consuelo Bernal, M., Cesar Giraldo, J., . . . Casero, R. D. (2016). Geographic distribution of human Blastocystis subtypes in South America. In (Vol. 41, pp. 32-35).
Ecuador	Bilsa Biological Station	96	58	Alouatta spp	ST8	31		PCR-based primer sets BLF and BLR (Menounos et al.2008),BH1F (Whipps et al.2010) and BHRDr (Scicluna et al.2006), and bl1400ForC and bl1710RevC	2015	Helenbrook et al	20,816	42,659	Helenbrook, W. D., Shields, W. M., & Whipps, C. M. (2015). Characterization of Blastocystis species infection in humans and mantled howler monkeys, Alouatta palliata aequatorialis, living in close proximity to one another. Parasitology Research, 114(7), 2517-2525.
Ecuador	Bilsa Biological Station	54	44	Humano	ST1	21		PCR-based primer sets BLF and BLR (Menounos et al.2008),BH1F (Whipps et al.2010) and BHRDr (Scicluna et al.2006), and bl1400ForC and bl1710RevC	2015	Helenbrook et al	20,816	42,659	Helenbrook, W. D., Shields, W. M., & Whipps, C. M. (2015). Characterization of Blastocystis species infection in humans and mantled howler monkeys, Alouatta palliata aequatorialis, living in close proximity to one another. Parasitology Research, 114(7), 2517-2525.
Ecuador	Bilsa Biological Station	54	44	Humano	ST2	10		PCR-based primer sets BLF and BLR (Menounos et al.2008),BH1F (Whipps et al.2010) and BHRDr (Scicluna et al.2006), and bl1400ForC and bl1710RevC	2015	Helenbrook et al	20,816	42,659	Helenbrook, W. D., Shields, W. M., & Whipps, C. M. (2015). Characterization of Blastocystis species infection in humans and mantled howler monkeys, Alouatta palliata aequatorialis, living in close proximity to one another. Parasitology Research, 114(7), 2517-2525.
Ecuador	Bilsa Biological Station	54	44	Humano	ST3	12		PCR-based primer sets BLF and BLR (Menounos et al.2008),BH1F (Whipps et al.2010) and BHRDr (Scicluna et al.2006), and bl1400ForC and bl1710RevC	2015	Helenbrook et al	20,816	42,659	Helenbrook, W. D., Shields, W. M., & Whipps, C. M. (2015). Characterization of Blastocystis species infection in humans and mantled howler monkeys, Alouatta palliata aequatorialis, living in close proximity to one another. Parasitology Research, 114(7), 2517-2525.
EE.UU	Beltsville, Maryland USA	32	11	Cerdo	ST5	11		PCR, and sequenced in both directions using M13 forward and reverse primers. Up to tenclones from each specimen were sequenced_x000D_	2014	Fayer et al	39.0455	-76.9242	Fayer, R., Elsasser, T., Gould, R., Solano, G., Urban, J., & Santin, M. (2014). Blastocystis tropism in the pig intestine. Parasitology Research, 113(4), 1465-1472.
EE.UU	Beltsville, Maryland USA	47	9	Ganado	ST10	8		PCR, and sequenced in both directions using M13 forward and reverse primers. Up to tenclones from each specimen were sequenced	2012	Fayer et al	39.0455	-76.9242	Fayer, R., Santin, M., & Macarisin, D. (2012). Detection of concurrent infection of dairy cattle with Blastocystis, Cryptosporidium, Giardia, and Enterocytozoon by molecular and microscopic methods. Parasitology Research, 111(3), 1349-1355.
EE.UU	Beltsville, Maryland USA	47	9	Ganado	ST14	3		PCR, and sequenced in both directions using M13 forward and reverse primers. Up to tenclones from each specimen were sequenced	2012	Fayer et al	39.0455	-76.9242	Fayer, R., Santin, M., & Macarisin, D. (2012). Detection of concurrent infection of dairy cattle with Blastocystis, Cryptosporidium, Giardia, and Enterocytozoon by molecular and microscopic methods. Parasitology Research, 111(3), 1349-1355.
EE.UU	Western Oregon (Metropolitan area of Corvallis)	21	9	Humano	ST3	6			2009	Jones et al	44.57	-123.278	Jones, M. S., Whipps, C. M., Ganac, R. D., Hudson, N. R., & Boorom, K. (2009). Association of Blastocystis subtype 3 and 1 with patients from an Oregon community presenting with chronic gastrointestinal illness. Parasitology Research, 104(2), 341-345.
EE.UU	Western Oregon (Metropolitan area of Corvallis)	21	9	Humano	ST1	1			2009	Jones et al	44.57	-123.278	Jones, M. S., Whipps, C. M., Ganac, R. D., Hudson, N. R., & Boorom, K. (2009). Association of Blastocystis subtype 3 and 1 with patients from an Oregon community presenting with chronic gastrointestinal illness. Parasitology Research, 104(2), 341-345.
EE.UU	Maryland, State	1	1	Humano	ST4	1			2011	Satín et al	39.3002	-76.6105	Santin, M., Teresa Gomez-Munoz, M., Solano-Aguilar, G., & Fayer, R. (2011). Development of a new PCR protocol to detect and subtype Blastocystis spp. from humans and animals. In (Vol. 109, pp. 205-212)
EE.UU	Maryland, State	7	7	Ganado	ST10	7			2011	Satín et al	39.3002	-76.6105	Santin, M., Teresa Gomez-Munoz, M., Solano-Aguilar, G., & Fayer, R. (2011). Development of a new PCR protocol to detect and subtype Blastocystis spp. from humans and animals. In (Vol. 109, pp. 205-212)
EE.UU	Maryland, State	6	6	Cerdo	ST5	6			2011	Satín et al	39.3002	-76.6105	Santin, M., Teresa Gomez-Munoz, M., Solano-Aguilar, G., & Fayer, R. (2011). Development of a new PCR protocol to detect and subtype Blastocystis spp. from humans and animals. In (Vol. 109, pp. 205-212)
EE.UU	Colorado, State	139	10	Humano	ST1	2	a4		2016	Scanlan et al	39.7618	-104.881	Scanlan, P. D., Knight, R., Song, S. J., Ackermann, G., & Cotter, P. D. (2016). Research paper: Prevalence and genetic diversity of Blastocystis in family units living in the United States. Infection, Genetics and Evolution, 45, 95-97.
EE.UU	Colorado, State	139	10	Humano	ST2	3	a9,12		2016	Scanlan et al	39.7618	-104.881	Scanlan, P. D., Knight, R., Song, S. J., Ackermann, G., & Cotter, P. D. (2016). Research paper: Prevalence and genetic diversity of Blastocystis in family units living in the United States. Infection, Genetics and Evolution, 45, 95-97.
EE.UU	Colorado, State	139	10	Humano	ST3	5	a34,36		2016	Scanlan et al	39.7618	-104.881	Scanlan, P. D., Knight, R., Song, S. J., Ackermann, G., & Cotter, P. D. (2016). Research paper: Prevalence and genetic diversity of Blastocystis in family units living in the United States. Infection, Genetics and Evolution, 45, 95-97.
EE.UU	Portland, Oregon	103	10	Perro	ST1	2			2014	Ruaux et al	45.5369	-122.65	Ruaux, C., G., & Stang, B. (2014). Prevalence of blastocystis in shelter-resident and client-owned companion animals in the US Pacific Northwest. PLoS ONE, Vol 9, Iss 9, p e107496 (2014)(9), e107496.
EE.UU	Portland, Oregon	103	10	Perro	ST10	2			2014	Ruaux et al	45.5369	-122.65	Ruaux, C., G., & Stang, B. (2014). Prevalence of blastocystis in shelter-resident and client-owned companion animals in the US Pacific Northwest. PLoS ONE, Vol 9, Iss 9, p e107496 (2014)(9), e107496.
EE.UU	Portland, Oregon	105	12	Gato	ST1	1			2014	Ruaux et al	45.5369	-122.65	Ruaux, C., G., & Stang, B. (2014). Prevalence of blastocystis in shelter-resident and client-owned companion animals in the US Pacific Northwest. PLoS ONE, Vol 9, Iss 9, p e107496 (2014)(9), e107496.
EE.UU	Portland, Oregon	105	12	Gato	ST3	1			2014	Ruaux et al	45.5369	-122.65	Ruaux, C., G., & Stang, B. (2014). Prevalence of blastocystis in shelter-resident and client-owned companion animals in the US Pacific Northwest. PLoS ONE, Vol 9, Iss 9, p e107496 (2014)(9), e107496.
EE.UU	Portland, Oregon	105	12	Gato	ST10	3			2014	Ruaux et al	45.5369	-122.65	Ruaux, C., G., & Stang, B. (2014). Prevalence of blastocystis in shelter-resident and client-owned companion animals in the US Pacific Northwest. PLoS ONE, Vol 9, Iss 9, p e107496 (2014)(9), e107496.
EE.UU	California, State	1	2	Humano	ST4	1			2008	Jones et al_x000D_	34.0194	-118.411	Jones, M. S., II, Ganac, R. D., Hiser, G., Hudson, N. R., Le, A., & Whipps, C. M. (2008). Detection of Blastocystis from stool samples using real-time PCR. In (Vol. 103, pp. 551-557).
EE.UU	Western Oregon	2	2	Humano	ST1	1			2008	Jones et al_x000D_	45.5369	-122.65	Jones, M. S., II, Ganac, R. D., Hiser, G., Hudson, N. R., Le, A., & Whipps, C. M. (2008). Detection of Blastocystis from stool samples using real-time PCR. In (Vol. 103, pp. 551-557).
EE.UU	Western Oregon	2	2	Humano	ST3	1			2008	Jones et al_x000D_	45.5369	-122.65	Jones, M. S., II, Ganac, R. D., Hiser, G., Hudson, N. R., Le, A., & Whipps, C. M. (2008). Detection of Blastocystis from stool samples using real-time PCR. In (Vol. 103, pp. 551-557).
EE.UU	California, State	241	3	Ganado	ST3	1		an approximately 500 base pair fragment of_x000D_ the Blastocystis SSU rDNA gene,	2018	Maloney et al	34.0194	-118.411	Maloney, J. G., Lombard, J. E., Urie, N. J., Shivley, C. B., & Santin, M. (2018). Zoonotic and genetically diverse subtypes of Blastocystis in US pre-weaned dairy heifer calves. Parasitology Research.
EE.UU	California, State	241	3	Ganado	ST17	1		an approximately 500 base pair fragment of_x000D_ the Blastocystis SSU rDNA gene,	2018	Maloney et al	34.0194	-118.411	Maloney, J. G., Lombard, J. E., Urie, N. J., Shivley, C. B., & Santin, M. (2018). Zoonotic and genetically diverse subtypes of Blastocystis in US pre-weaned dairy heifer calves. Parasitology Research.
EE.UU	California, State	241	3	Ganado	ST24	1		an approximately 500 base pair fragment of_x000D_ the Blastocystis SSU rDNA gene,	2018	Maloney et al	34.0194	-118.411	Maloney, J. G., Lombard, J. E., Urie, N. J., Shivley, C. B., & Santin, M. (2018). Zoonotic and genetically diverse subtypes of Blastocystis in US pre-weaned dairy heifer calves. Parasitology Research.
EE.UU	Colorado, State	208	1	Ganado	ST14	1		an approximately 500 base pair fragment of_x000D_ the Blastocystis SSU rDNA gene,	2018	Maloney et al	39.7618	-104.881	Maloney, J. G., Lombard, J. E., Urie, N. J., Shivley, C. B., & Santin, M. (2018). Zoonotic and genetically diverse subtypes of Blastocystis in US pre-weaned dairy heifer calves. Parasitology Research.
EE.UU	Iowa, State	64	0	Ganado	-	0		an approximately 500 base pair fragment of_x000D_ the Blastocystis SSU rDNA gene,	2018	Maloney et al	39.7618	-104.881	Maloney, J. G., Lombard, J. E., Urie, N. J., Shivley, C. B., & Santin, M. (2018). Zoonotic and genetically diverse subtypes of Blastocystis in US pre-weaned dairy heifer calves. Parasitology Research.
EE.UU	Michigan, State	98	5	Ganado	ST5	3		an approximately 500 base pair fragment of_x000D_ the Blastocystis SSU rDNA gene,	2018	Maloney et al	42.9612	-85.6556	Maloney, J. G., Lombard, J. E., Urie, N. J., Shivley, C. B., & Santin, M. (2018). Zoonotic and genetically diverse subtypes of Blastocystis in US pre-weaned dairy heifer calves. Parasitology Research.
EE.UU	Michigan, State	98	5	Ganado	ST14	1		an approximately 500 base pair fragment of_x000D_ the Blastocystis SSU rDNA gene,	2018	Maloney et al	42.9612	-85.6556	Maloney, J. G., Lombard, J. E., Urie, N. J., Shivley, C. B., & Santin, M. (2018). Zoonotic and genetically diverse subtypes of Blastocystis in US pre-weaned dairy heifer calves. Parasitology Research.
EE.UU	Michigan, State	98	5	Ganado	ST10	1		an approximately 500 base pair fragment of_x000D_ the Blastocystis SSU rDNA gene,	2018	Maloney et al	42.9612	-85.6556	Maloney, J. G., Lombard, J. E., Urie, N. J., Shivley, C. B., & Santin, M. (2018). Zoonotic and genetically diverse subtypes of Blastocystis in US pre-weaned dairy heifer calves. Parasitology Research.
EE.UU	Michigan, State	98	5	Ganado	ST26	1		an approximately 500 base pair fragment of_x000D_ the Blastocystis SSU rDNA gene,	2018	Maloney et al	42.9612	-85.6556	Maloney, J. G., Lombard, J. E., Urie, N. J., Shivley, C. B., & Santin, M. (2018). Zoonotic and genetically diverse subtypes of Blastocystis in US pre-weaned dairy heifer calves. Parasitology Research.
EE.UU	Minnesota, State	205	4	Ganado	ST4	4		an approximately 500 base pair fragment of_x000D_ the Blastocystis SSU rDNA gene,	2018	Maloney et al	44.9618	-93.267	Maloney, J. G., Lombard, J. E., Urie, N. J., Shivley, C. B., & Santin, M. (2018). Zoonotic and genetically diverse subtypes of Blastocystis in US pre-weaned dairy heifer calves. Parasitology Research.
EE.UU	Missouri, State	23	0	Ganado	-	0		an approximately 500 base pair fragment of_x000D_ the Blastocystis SSU rDNA gene,	2018	Maloney et al	44.9618	-93.267	Maloney, J. G., Lombard, J. E., Urie, N. J., Shivley, C. B., & Santin, M. (2018). Zoonotic and genetically diverse subtypes of Blastocystis in US pre-weaned dairy heifer calves. Parasitology Research.
EE.UU	New York, City	324	11	Ganado	ST3	3		an approximately 500 base pair fragment of_x000D_ the Blastocystis SSU rDNA gene,	2018	Maloney et al	40.6643	-73.9385	Maloney, J. G., Lombard, J. E., Urie, N. J., Shivley, C. B., & Santin, M. (2018). Zoonotic and genetically diverse subtypes of Blastocystis in US pre-weaned dairy heifer calves. Parasitology Research.
EE.UU	New York, City	324	11	Ganado	ST5	1		an approximately 500 base pair fragment of_x000D_ the Blastocystis SSU rDNA gene,	2018	Maloney et al	40.6643	-73.9385	Maloney, J. G., Lombard, J. E., Urie, N. J., Shivley, C. B., & Santin, M. (2018). Zoonotic and genetically diverse subtypes of Blastocystis in US pre-weaned dairy heifer calves. Parasitology Research.
EE.UU	New York, City	324	11	Ganado	ST10	2		an approximately 500 base pair fragment of_x000D_ the Blastocystis SSU rDNA gene,	2018	Maloney et al	40.6643	-73.9385	Maloney, J. G., Lombard, J. E., Urie, N. J., Shivley, C. B., & Santin, M. (2018). Zoonotic and genetically diverse subtypes of Blastocystis in US pre-weaned dairy heifer calves. Parasitology Research.
EE.UU	New York, City	324	11	Ganado	ST14	3		an approximately 500 base pair fragment of_x000D_ the Blastocystis SSU rDNA gene,	2018	Maloney et al	40.6643	-73.9385	Maloney, J. G., Lombard, J. E., Urie, N. J., Shivley, C. B., & Santin, M. (2018). Zoonotic and genetically diverse subtypes of Blastocystis in US pre-weaned dairy heifer calves. Parasitology Research.
EE.UU	New York, City	324	11	Ganado	ST25	1		an approximately 500 base pair fragment of_x000D_ the Blastocystis SSU rDNA gene,	2018	Maloney et al	40.6643	-73.9385	Maloney, J. G., Lombard, J. E., Urie, N. J., Shivley, C. B., & Santin, M. (2018). Zoonotic and genetically diverse subtypes of Blastocystis in US pre-weaned dairy heifer calves. Parasitology Research.
EE.UU	New York, City	324	11	Ganado	ST23	1		an approximately 500 base pair fragment of_x000D_ the Blastocystis SSU rDNA gene,	2018	Maloney et al	40.6643	-73.9385	Maloney, J. G., Lombard, J. E., Urie, N. J., Shivley, C. B., & Santin, M. (2018). Zoonotic and genetically diverse subtypes of Blastocystis in US pre-weaned dairy heifer calves. Parasitology Research.
EE.UU	New York, City	324	11	Ganado	ST24	1		an approximately 500 base pair fragment of_x000D_ the Blastocystis SSU rDNA gene,	2018	Maloney et al	40.6643	-73.9385	Maloney, J. G., Lombard, J. E., Urie, N. J., Shivley, C. B., & Santin, M. (2018). Zoonotic and genetically diverse subtypes of Blastocystis in US pre-weaned dairy heifer calves. Parasitology Research.
EE.UU	New York, City	324	11	Ganado	ST26	1		an approximately 500 base pair fragment of_x000D_ the Blastocystis SSU rDNA gene,	2018	Maloney et al	40.6643	-73.9385	Maloney, J. G., Lombard, J. E., Urie, N. J., Shivley, C. B., & Santin, M. (2018). Zoonotic and genetically diverse subtypes of Blastocystis in US pre-weaned dairy heifer calves. Parasitology Research.
EE.UU	Ohio, State	55	1	Ganado	ST14	1		an approximately 500 base pair fragment of_x000D_ the Blastocystis SSU rDNA gene,	2018	Maloney et al	39.9844	-82.9848	Maloney, J. G., Lombard, J. E., Urie, N. J., Shivley, C. B., & Santin, M. (2018). Zoonotic and genetically diverse subtypes of Blastocystis in US pre-weaned dairy heifer calves. Parasitology Research.
EE.UU	Pennsylvania, State	119	7	Ganado	ST5	6		an approximately 500 base pair fragment of_x000D_ the Blastocystis SSU rDNA gene,	2018	Maloney et al	40.0094	-75.1333	Maloney, J. G., Lombard, J. E., Urie, N. J., Shivley, C. B., & Santin, M. (2018). Zoonotic and genetically diverse subtypes of Blastocystis in US pre-weaned dairy heifer calves. Parasitology Research.
EE.UU	Pennsylvania, State	119	7	Ganado	ST10	1		an approximately 500 base pair fragment of_x000D_ the Blastocystis SSU rDNA gene,	2018	Maloney et al	40.0094	-75.1333	Maloney, J. G., Lombard, J. E., Urie, N. J., Shivley, C. B., & Santin, M. (2018). Zoonotic and genetically diverse subtypes of Blastocystis in US pre-weaned dairy heifer calves. Parasitology Research.
EE.UU	Vermont, State	58	15	Ganado	ST4	14		an approximately 500 base pair fragment of_x000D_ the Blastocystis SSU rDNA gene,	2018	Maloney et al	43.6576	-72.7844	Maloney, J. G., Lombard, J. E., Urie, N. J., Shivley, C. B., & Santin, M. (2018). Zoonotic and genetically diverse subtypes of Blastocystis in US pre-weaned dairy heifer calves. Parasitology Research.
EE.UU	Vermont, State	58	15	Ganado	-	1		an approximately 500 base pair fragment of_x000D_ the Blastocystis SSU rDNA gene,	2018	Maloney et al	43.6576	-72.7844	Maloney, J. G., Lombard, J. E., Urie, N. J., Shivley, C. B., & Santin, M. (2018). Zoonotic and genetically diverse subtypes of Blastocystis in US pre-weaned dairy heifer calves. Parasitology Research.
EE.UU	Virginia, State	16	0	Ganado	-	0		an approximately 500 base pair fragment of_x000D_ the Blastocystis SSU rDNA gene,	2018	Maloney et al	38.8803	-77.1083	Maloney, J. G., Lombard, J. E., Urie, N. J., Shivley, C. B., & Santin, M. (2018). Zoonotic and genetically diverse subtypes of Blastocystis in US pre-weaned dairy heifer calves. Parasitology Research.
EE.UU	Washington, State	462	14	Ganado	ST5	12		an approximately 500 base pair fragment of_x000D_ the Blastocystis SSU rDNA gene,	2018	Maloney et al	38.9041	-77.0171	Maloney, J. G., Lombard, J. E., Urie, N. J., Shivley, C. B., & Santin, M. (2018). Zoonotic and genetically diverse subtypes of Blastocystis in US pre-weaned dairy heifer calves. Parasitology Research.
EE.UU	Washington, State	462	14	Ganado	ST26	2		an approximately 500 base pair fragment of_x000D_ the Blastocystis SSU rDNA gene,	2018	Maloney et al	38.9041	-77.0171	Maloney, J. G., Lombard, J. E., Urie, N. J., Shivley, C. B., & Santin, M. (2018). Zoonotic and genetically diverse subtypes of Blastocystis in US pre-weaned dairy heifer calves. Parasitology Research.
EE.UU	Wisconsin, State	666	12	Ganado	ST5	5		an approximately 500 base pair fragment of_x000D_ the Blastocystis SSU rDNA gene,	2018	Maloney et al	43.6351	-89.7825	Maloney, J. G., Lombard, J. E., Urie, N. J., Shivley, C. B., & Santin, M. (2018). Zoonotic and genetically diverse subtypes of Blastocystis in US pre-weaned dairy heifer calves. Parasitology Research.
EE.UU	Wisconsin, State	666	12	Ganado	ST10	1		an approximately 500 base pair fragment of_x000D_ the Blastocystis SSU rDNA gene,	2018	Maloney et al	43.6351	-89.7825	Maloney, J. G., Lombard, J. E., Urie, N. J., Shivley, C. B., & Santin, M. (2018). Zoonotic and genetically diverse subtypes of Blastocystis in US pre-weaned dairy heifer calves. Parasitology Research.
EE.UU	Wisconsin, State	666	12	Ganado	ST14	1		an approximately 500 base pair fragment of_x000D_ the Blastocystis SSU rDNA gene,	2018	Maloney et al	43.6351	-89.7825	Maloney, J. G., Lombard, J. E., Urie, N. J., Shivley, C. B., & Santin, M. (2018). Zoonotic and genetically diverse subtypes of Blastocystis in US pre-weaned dairy heifer calves. Parasitology Research.
EE.UU	Wisconsin, State	666	12	Ganado	ST17	2		an approximately 500 base pair fragment of_x000D_ the Blastocystis SSU rDNA gene,	2018	Maloney et al	43.6351	-89.7825	Maloney, J. G., Lombard, J. E., Urie, N. J., Shivley, C. B., & Santin, M. (2018). Zoonotic and genetically diverse subtypes of Blastocystis in US pre-weaned dairy heifer calves. Parasitology Research.
EE.UU	Wisconsin, State	666	12	Ganado	ST21	2		an approximately 500 base pair fragment of_x000D_ the Blastocystis SSU rDNA gene,	2018	Maloney et al	43.6351	-89.7825	Maloney, J. G., Lombard, J. E., Urie, N. J., Shivley, C. B., & Santin, M. (2018). Zoonotic and genetically diverse subtypes of Blastocystis in US pre-weaned dairy heifer calves. Parasitology Research.
EE.UU	Wisconsin, State	666	12	Ganado	ST26	1		an approximately 500 base pair fragment of_x000D_ the Blastocystis SSU rDNA gene,	2018	Maloney et al	43.6351	-89.7825	Maloney, J. G., Lombard, J. E., Urie, N. J., Shivley, C. B., & Santin, M. (2018). Zoonotic and genetically diverse subtypes of Blastocystis in US pre-weaned dairy heifer calves. Parasitology Research.
EE.UU	Oregon, State	19	5	Humano	ST1	1			2010	Whipps et al	45.5369	-122.65	Whipps, C. M., Boorom, K., Bermudez, L. E., & Kent, M. L. (2010). Molecular characterization of Blastocystis species in Oregon identifies multiple subtypes. In (Vol. 106, pp. 827-832).
EE.UU	Oregon, State	19	5	Humano	ST2	1			2010	Whipps et al	45.5369	-122.65	Whipps, C. M., Boorom, K., Bermudez, L. E., & Kent, M. L. (2010). Molecular characterization of Blastocystis species in Oregon identifies multiple subtypes. In (Vol. 106, pp. 827-832).
EE.UU	Oregon, State	19	5	Humano	ST3	1			2010	Whipps et al	45.5369	-122.65	Whipps, C. M., Boorom, K., Bermudez, L. E., & Kent, M. L. (2010). Molecular characterization of Blastocystis species in Oregon identifies multiple subtypes. In (Vol. 106, pp. 827-832).
EE.UU	Oregon, State	19	5	Humano	ST4	1			2010	Whipps et al	45.5369	-122.65	Whipps, C. M., Boorom, K., Bermudez, L. E., & Kent, M. L. (2010). Molecular characterization of Blastocystis species in Oregon identifies multiple subtypes. In (Vol. 106, pp. 827-832).
EE.UU	Oregon, State	19	5	Humano	ST8	1			2010	Whipps et al	45.5369	-122.65	Whipps, C. M., Boorom, K., Bermudez, L. E., & Kent, M. L. (2010). Molecular characterization of Blastocystis species in Oregon identifies multiple subtypes. In (Vol. 106, pp. 827-832).
EE.UU	EE.UU	44	11	Humano	ST1	4			2017	Nash et al	45.5369	-122.65	Nash, A. K., Auchtung, T. A., Wong, M. C., Smith, D. P., Gesell, J. R., Ross, M. C., . . . Petrosino, J. F. (2017). The gut mycobiome of the Human Microbiome Project healthy cohort. Microbiome, 5(1), 153-153.
EE.UU	EE.UU	44	11	Humano	ST2	2			2017	Nash et al	45.5369	-122.65	Nash, A. K., Auchtung, T. A., Wong, M. C., Smith, D. P., Gesell, J. R., Ross, M. C., . . . Petrosino, J. F. (2017). The gut mycobiome of the Human Microbiome Project healthy cohort. Microbiome, 5(1), 153-153.
EE.UU	EE.UU	44	11	Humano	ST3	6			2017	Nash et al	45.5369	-122.65	Nash, A. K., Auchtung, T. A., Wong, M. C., Smith, D. P., Gesell, J. R., Ross, M. C., . . . Petrosino, J. F. (2017). The gut mycobiome of the Human Microbiome Project healthy cohort. Microbiome, 5(1), 153-153.
México	Hermosillo, ciudad	80	80	Humano	ST1	30			2016	Villegas-Gómez et al	29.0892	-110.961	Villegas-Gómez, I., Martínez-Hernández, F., Urrea-Quezada, A., González-Díaz, M., Durazo, M., Hernández, J., ... & Valenzuela, O. (2016). Comparison of the genetic variability of Blastocystis subtypes between human carriers from two contrasting climatic regions of México. Infection, Genetics and Evolution, 44, 334-340.
México	Hermosillo, ciudad	80	80	Humano	ST2	8			2016	Villegas-Gómez et al	29.0892	-110.961	Villegas-Gómez, I., Martínez-Hernández, F., Urrea-Quezada, A., González-Díaz, M., Durazo, M., Hernández, J., ... & Valenzuela, O. (2016). Comparison of the genetic variability of Blastocystis subtypes between human carriers from two contrasting climatic regions of México. Infection, Genetics and Evolution, 44, 334-340.
México	Hermosillo, ciudad	80	80	Humano	ST3	42			2016	Villegas-Gómez et al	29.0892	-110.961	Villegas-Gómez, I., Martínez-Hernández, F., Urrea-Quezada, A., González-Díaz, M., Durazo, M., Hernández, J., ... & Valenzuela, O. (2016). Comparison of the genetic variability of Blastocystis subtypes between human carriers from two contrasting climatic regions of México. Infection, Genetics and Evolution, 44, 334-340.
México	Morelia, Michoacán	43	24	Humano	ST1	24			2014	Villalobos et al	19.7006	-110.961	Villalobos, G., Orozco-Mosqueda, G. E., Lopez-Perez, M., Lopez-Escamilla, E., Córdoba-Aguilar, A., Rangel-Gamboa, L., ... & Martinez-Hernandez, F. (2014). Suitability of internal transcribed spacers (ITS) as markers for the population genetic structure of Blastocystis spp. Parasites & vectors, 7(1), 461.
México	Morelia, Michoacán	43	24	Humano	ST2	10			2104	Villalobos et al	19.7006	-110.961	Villalobos, G., Orozco-Mosqueda, G. E., Lopez-Perez, M., Lopez-Escamilla, E., Córdoba-Aguilar, A., Rangel-Gamboa, L., ... & Martinez-Hernandez, F. (2014). Suitability of internal transcribed spacers (ITS) as markers for the population genetic structure of Blastocystis spp. Parasites & vectors, 7(1), 461.
México	Morelia, Michoacán	43	24	Humano	ST3	9			2014	Villalobos et al	19.7006	-110.961	Villalobos, G., Orozco-Mosqueda, G. E., Lopez-Perez, M., Lopez-Escamilla, E., Córdoba-Aguilar, A., Rangel-Gamboa, L., ... & Martinez-Hernandez, F. (2014). Suitability of internal transcribed spacers (ITS) as markers for the population genetic structure of Blastocystis spp. Parasites & vectors, 7(1), 461.
México	Toluca, Hospital para el Niño del Instituto Materno Infantil, Estado de México (IMIEM)	192	21	Humano	ST1	9			2019	Alarcón-Valdes et al	19.2879	-110.961	Alarcon-Valdes, P., Villalobos, G., Martinez-Flores, W. A., Lopez-Escamilla, E., Gonzalez-Arenas, N. R., Romero-Valdovinos, M., ... & Maravilla, P. (2018). Can the pyruvate: ferredoxin oxidoreductase (PFOR) gene be used as an additional marker to discriminate among Blastocystis strains or subtypes?. Parasites & vectors, 11(1), 564.
México	Toluca, Hospital para el Niño del Instituto Materno Infantil, Estado de México (IMIEM)	192	21	Humano	ST2	4			2019	Alarcón-Valdes et al	19.2879	-110.961	Alarcon-Valdes, P., Villalobos, G., Martinez-Flores, W. A., Lopez-Escamilla, E., Gonzalez-Arenas, N. R., Romero-Valdovinos, M., ... & Maravilla, P. (2018). Can the pyruvate: ferredoxin oxidoreductase (PFOR) gene be used as an additional marker to discriminate among Blastocystis strains or subtypes?. Parasites & vectors, 11(1), 564.
México	Toluca, Hospital para el Niño del Instituto Materno Infantil, Estado de México (IMIEM)	192	21	Humano	ST3	9			2019	Alarcón-Valdes et al	19.2879	-110.961	Alarcon-Valdes, P., Villalobos, G., Martinez-Flores, W. A., Lopez-Escamilla, E., Gonzalez-Arenas, N. R., Romero-Valdovinos, M., ... & Maravilla, P. (2018). Can the pyruvate: ferredoxin oxidoreductase (PFOR) gene be used as an additional marker to discriminate among Blastocystis strains or subtypes?. Parasites & vectors, 11(1), 564.
México	Toluca, Hospital para el Niño del Instituto Materno Infantil, Estado de México (IMIEM)	192	21	Humano	ST7	1			2019	Alarcón-Valdes et al	19.2879	-110.961	Alarcon-Valdes, P., Villalobos, G., Martinez-Flores, W. A., Lopez-Escamilla, E., Gonzalez-Arenas, N. R., Romero-Valdovinos, M., ... & Maravilla, P. (2018). Can the pyruvate: ferredoxin oxidoreductase (PFOR) gene be used as an additional marker to discriminate among Blastocystis strains or subtypes?. Parasites & vectors, 11(1), 564.
Perú	PERÚ	13	13	Humano	Novel ST	12		PCR amplification of Blastocystis-specific SSUr DNA using the primers RD5 (5′-ATCTGGTTGATCCTGCCAGT-3′) and BhRDr (5′-GAGCTTTTTAACTGCAACAACG-3′)	2016	Ramirez et al			Ramirez, J. D., Sanchez, A., Hernandez, C., Florez, C., Consuelo Bernal, M., Cesar Giraldo, J., . . . Casero, R. D. (2016). Geographic distribution of human Blastocystis subtypes in South America. In (Vol. 41, pp. 32-35).
